# Supplementary material for: Catalyst and solvent free microwave-assisted synthesis of substituted 1,2,3-triazoles
Source: Royal Society of Chemistry journal article supplement (doi:10.1039/c8gc01516c), 2018-01-01
Supplement: c8gc01516c1.pdf [file c8gc01516c1.pdf]

## SUPPORTING INFORMATION

### **Catalyst and Solvent Free Microwave Assisted Synthesis of Substituted 1,2,3-Triazoles**

Sahar Roshandel,<sup>a</sup> Suresh C. Suri,<sup>\*a</sup> Jacob C. Marcischak,<sup>b</sup> Golam Rasul,<sup>a</sup> G. K. Surya Prakash<sup>\*a</sup>

<sup>a</sup> Loker Hydrocarbon Research Institute and Department of Chemistry, University of Southern California, Los Angeles, California 90089-1661, USA. <sup>b</sup> Air Force Research Laboratory/Rocket Propulsion Division, Edwards Air Force Base, CA, 93524, USA

*E-mail gprakash@usc.edu, sureshsuri52@gmail.com*

#### **TABLE OF CONTENTS**

|                                                |     |
|------------------------------------------------|-----|
| General remarks                                | S2  |
| Microwave irradiation experiment               | S2  |
| General procedure                              | S2  |
| DFT Study                                      | S3  |
| Characterization data of all products          | S3  |
| References                                     | S7  |
| Microwave data and NMR Spectra of all products | S8  |
| X-ray Structure Determination for <b>16</b>    | S43 |

**General Remarks:**

$^1\text{H}$ ,  $^{13}\text{C}$ , and  $^{19}\text{F}$  NMR spectra were recorded on Varian 600, 500, and 400 MHz NMR spectrometers.  $^1\text{H}$  NMR and  $^{13}\text{C}$  chemical shifts were determined relative to the signal of a residual protonated solvent.  $^{19}\text{F}$  NMR chemical shifts were determined relative to  $\text{CFCl}_3$  as an internal standard (0.0 ppm). IR data was recorded on a JASCO FT/IR-4600 infrared spectrometer. HRMS (EI and ESI) analysis was performed at the School of Chemical Sciences Mass Spectrometry Laboratory, University of Illinois, Urbana-Champaign. Flash chromatographic purification of compounds was performed using a Biotage, Isolera One, accelerated chromatographic isolation (ACI) automated flash column chromatogram. All reactions mixtures were prepared under argon or nitrogen atmosphere ( $\text{Ar}/\text{N}_2$  glovebox). Unless otherwise mentioned, all reagents were purchased in the highest purity from commercial sources and used without further purification.

**Microwave Irradiation Experiment:**

All microwave irradiation reactions were carried out in a Biotage® Initiator+ microwave reactor, operating with continuous irradiation power from 0 to 400 W and heating up to 300 °C with a cut-off of 30 bar pressure. The microwave reactor was used in the standard configuration as delivered. All reactions were carried out in a Biotage® microwave vial and sealed with an aluminum/Teflon® crimp top, which enables to bear maximum internal pressure of 30 bar. The built-in IR sensor of the instrument measures the temperature at all time. After the irradiation period, the reaction vial was cooled down to the ambient temperature by the built-in gas jet cooling before the safety cap was removed.

**General Procedure:**

Acetylene derivative (1.0 equivalent) and trimethylsilyl azide (1.5 equivalent) were transferred to a 0.5-2 mL Biotage microwave vial equipped with a magnetic stir-bar under inert condition. The vial was tightly sealed with aluminum/Teflon® crimp top and was exposed to microwave irradiation at a constant temperature of 200 °C for the time indicated in table 2. After completion of the reaction (until no change in pressure was observed), the reaction mixture was cooled to ambient temperature. Subsequently, the reaction mixture was transferred to a beaker using diethyl ether and was exposed to air for 30 minutes. The reaction mixture was dissolved in minimum amount of hot dichloromethane and pure products were obtained by recrystallization in hexanes. Product **2**, **9**, and **12** were purified by flash silica column chromatography (25% ethyl acetate in hexanes).

**CAUTION: In presence of moisture,  $\text{TMSN}_3$  hydrolyzes to highly toxic hydrazoic acid ( $\text{HN}_3$ ) and therefore all the chemicals MUST be stored free of moisture. The outlined procedures are designed for neat reactions, one must avoid using protic solvents with  $\text{TMSN}_3$  as it readily generates  $\text{HN}_3$ .**

### DFT Study:

Gaussian 09 program (Frisch, M. J.; et al. *Gaussian 09*, Revision A.02, 2009) was employed for geometry optimizations and frequency calculations. The geometries were optimized at the B3LYP/6-311+G\*\* level. Vibrational frequencies at the B3LYP/6-311+G\*\* level were used to characterize stationary points as minima (NIMAG (number of imaginary frequency) = 0) or transition state (NIMAG = 1) and to evaluate zero point vibrational energies (ZPE), which were scaled by a factor of 0.96. Relative energies were calculated at the B3LYP/6-311++G(3df,3pd)//B3LYP/6-311+G\*\* + ZPE level.

### Characterization Data of All Products:

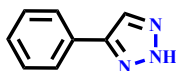

**4-Phenyl-2H-1,2,3-triazole (1)**<sup>1</sup> was obtained from phenylacetylene (5 mmol) and trimethylsilyl azide and purified by recrystallization as a white solid in 99% yield (717 mg). **<sup>1</sup>H NMR** (500 MHz, DMSO-*d*<sub>6</sub>) δ 8.33 (bs, 1H), 7.86 (d, *J* = 7.6 Hz, 2H), 7.45 (t, *J* = 7.6 Hz, 2H), 7.35 (t, *J* = 7.6 Hz, 1H). **<sup>13</sup>C NMR** (126 MHz, DMSO-*d*<sub>6</sub>) δ 145.9, 130.5, 128.9, 128.1, 125.5. **HRMS (ESI)** calculated for C<sub>8</sub>H<sub>8</sub>N<sub>3</sub>: [M+H]<sup>+</sup> 146.0718, found: 146.0720. **FT/IR** (ν<sub>max</sub> (neat) cm<sup>-1</sup>) 3154, 3121, 2948, 2822, 1661, 1456, 971, 874.765. **R<sub>f</sub>** (1:1-hexanes:ethylacetate): 0.36. This reaction was also carried out with 12 mmol of phenylacetylene and the final product was obtained in 98% yield.

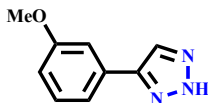

**4-(3-Methoxyphenyl)-2H-1,2,3-triazole (2)**<sup>2</sup> was obtained from (3-methoxyphenyl)acetylene (4 mmol) and trimethylsilyl azide and purified by flash column chromatography as a very viscous oil in 90% yield (630 mg). **<sup>1</sup>H NMR** (500 MHz, Chloroform-*d*) δ 12.24 (s, 1H), 7.98 (s, 1H), 7.49 – 7.28 (m, 3H), 6.94 (dt, *J* = 7.7, 2.0 Hz, 1H), 3.88 (s, 3H). **<sup>13</sup>C NMR** (126 MHz, Chloroform-*d*) δ 160.2, 147.5, 131.2, 130.2 (contains two C signals), 118.7, 114.8, 111.5, 55.5. **HRMS (ESI)** calculated for C<sub>9</sub>H<sub>10</sub>N<sub>3</sub>O: [M+H]<sup>+</sup> 176.0824, found: 176.0820. **FT/IR** (ν<sub>max</sub> (neat) cm<sup>-1</sup>) 3142, 3100, 3014, 2925, 2823, 2661, 1609, 1593, 1559, 1486, 1320, 1230, 1320, 1230, 1144, 1075, 1037, 827, 788. **R<sub>f</sub>** (1:1-hexanes:ethylacetate): 0.29.

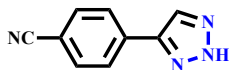

**4-(2H-1,2,3-Triazol-4-yl)benzonitrile (3)**<sup>1</sup> was obtained from 4-ethynylbenzonitrile (3 mmol) and trimethylsilyl azide and purified by recrystallization as yellow solid in 78% yield (397 mg). **<sup>1</sup>H NMR** (500 MHz, DMSO-*d*<sub>6</sub>) δ 8.56 (s, 1H), 8.07 (d, *J* = 8.1 Hz, 2H), 7.92 (d, *J* = 8.1 Hz, 2H). **<sup>13</sup>C NMR** (126 MHz, DMSO-*d*<sub>6</sub>) δ 144.3, 135.1, 133.0, 126.1, 118.8, 110.3. **HRMS (ESI)** calculated for C<sub>9</sub>H<sub>7</sub>N<sub>4</sub>: [M+H]<sup>+</sup> 171.0671, found: 171.0674. **FT/IR** (ν<sub>max</sub> (neat) cm<sup>-1</sup>) 3130, 3007, 2962, 2864, 2231, 1614, 1523, 1472, 1425, 1359, 1299, 1226, 1181, 1081, 999, 971, 841. **R<sub>f</sub>** (1:1-hexanes:ethylacetate): 0.23.

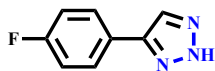

**4-(4-Fluorophenyl)-2H-1,2,3-triazole (4)**<sup>1</sup> was obtained from (4-fluorophenyl)acetylene (4 mmol) and trimethylsilyl azide and purified by recrystallization as a white crystalline solid in 55% yield (356 mg). **<sup>1</sup>H NMR** (500 MHz, DMSO-*d*<sub>6</sub>) δ 8.31 (s, 1H), 7.90 (dd, *J* = 8.6, 5.6 Hz, 2H), 7.29 (t, *J* = 8.6 Hz, 2H). **<sup>13</sup>C NMR** (126 MHz, DMSO-*d*<sub>6</sub>) δ 161.9 (d, *J* = 244.7 Hz), 145.1, 130.5, 127.6 (d, *J* = 7.3 Hz), 127.2, 115.8 (d, *J* = 21.6 Hz). **<sup>19</sup>F NMR** (470 MHz, Chloroform-*d*) δ -113.1. **HRMS (ESI)** calculated for C<sub>8</sub>H<sub>7</sub>N<sub>3</sub>F: [M+H]<sup>+</sup> 164.0624, found: 164.0627. **FT/IR** (ν<sub>max</sub> (neat) cm<sup>-1</sup>) 3148, 3119, 3044, 2973, 2858, 2775, 1910, 1610, 1534, 1465, 1228, 1160, 1134, 1096, 1003, 972, 839. **R<sub>f</sub>** (1:1-hexanes:ethylacetate):0.34.

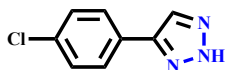

**4-(4-Chlorophenyl)-2H-1,2,3-triazole (5)**<sup>1</sup> was obtained from (4-chlorophenyl)acetylene (4 mmol) and trimethylsilyl azide and purified by recrystallization as a white crystalline solid in 87% yield (625 mg). **<sup>1</sup>H NMR** (500 MHz, DMSO-*d*<sub>6</sub>) δ 8.39 (s, 1H), 7.89 (d, *J* = 8.3 Hz, 2H), 7.52 (d, *J* = 8.3 Hz, 2H). **<sup>13</sup>C NMR** (126 MHz, DMSO-*d*<sub>6</sub>) δ 145.2, 132.9, 129.9, 129.4, 127.7. **HRMS (ESI)** calculated for C<sub>8</sub>H<sub>7</sub>N<sub>3</sub>Cl: [M+H]<sup>+</sup> 180.0329, found: 180.0329. **FT/IR** (ν<sub>max</sub> (neat) cm<sup>-1</sup>) 3157, 3128, 2984, 2958, 2842, 2740, 1918, 1677, 1606, 1524, 1460, 1417, 1297, 1225, 1133, 1100, 1073, 970, 834. **R<sub>f</sub>** (1:1-hexanes:ethylacetate):0.30.

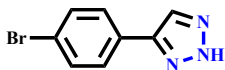

**4-(4-Bromophenyl)-2H-1,2,3-triazole (6)**<sup>1</sup> was obtained from (4-bromophenyl)acetylene (4 mmol) and trimethylsilyl azide and purified by recrystallization as a white crystalline solid in 88% yield (785 mg). **<sup>1</sup>H NMR** (500 MHz, DMSO-*d*<sub>6</sub>) δ 8.39 (s, 1H), 7.82 (d, *J* = 7.9 Hz, 2H), 7.65 (d, *J* = 7.9 Hz, 2H). **<sup>13</sup>C NMR** (126 MHz, DMSO-*d*<sub>6</sub>) δ 144.8, 131.9, 129.8, 127.5, 121.1. **HRMS (ESI)** calculated for C<sub>8</sub>H<sub>7</sub>N<sub>3</sub>Br: [M+H]<sup>+</sup> 223.9823, found: 223.9817. **FT/IR** (ν<sub>max</sub> (neat) cm<sup>-1</sup>) 3154, 3124, 2988, 2950, 2838, 1922, 1602, 1458, 1411, 1336, 1133, 1070, 1003, 970, 875, 831. **R<sub>f</sub>** (1:1-hexanes:ethylacetate): 0.33.

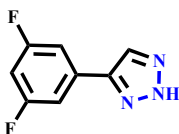

**4-(3,5-Difluorophenyl)-2H-1,2,3-triazole (7)** was obtained from (3,5-difluorophenyl)acetylene (3.5 mmol) and trimethylsilyl azide and purified by recrystallization as a white solid (m.p. 157-160 °C) in 82% yield (518 mg). **<sup>1</sup>H NMR** (400 MHz, Chloroform-*d*) δ 11.89 (s, 1H), 7.97 (s, 1H), 7.36 (dt, *J* = 6.5, 2.3 Hz, 2H), 6.83 (tt, *J* = 8.9, 2.3 Hz, 1H). **<sup>13</sup>C NMR** (126 MHz, Chloroform-*d*) δ 163.6 (dd, *J* = 248.6, 13.0 Hz), 146.1, 133.2 (t, *J* = 10.4 Hz), 131.2, 109.2 (dd, *J* = 19.6, 6.5 Hz), 104.15 (t, *J* = 25.4 Hz). **<sup>19</sup>F NMR** (470 MHz, Chloroform-*d*) δ -109.4 (pt, *J* = 7.0 Hz). **HRMS (ESI)** calculated for C<sub>8</sub>H<sub>6</sub>N<sub>3</sub>F<sub>2</sub>: [M+H]<sup>+</sup> 182.0530, found: 182.0535. **FT/IR** (ν<sub>max</sub> (neat) cm<sup>-1</sup>) 3153, 3103, 3077, 1629, 1590, 1459, 1437, 1249, 1234, 1119, 1076, 987, 840, 808. **R<sub>f</sub>** (1:1-hexanes:ethylacetate): 0.42.

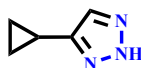

**4-Cyclopropyl-2H-1,2,3-triazole (8)**<sup>3</sup> was obtained from cyclopropylacetylene (5 mmol) and trimethylsilyl azide and purified by recrystallization as a white solid in 81% yield (441 mg). **<sup>1</sup>H NMR** (500 MHz, DMSO-*d*<sub>6</sub>) δ 7.52 (s, 1H), 1.95 (tt, *J* = 8.4, 5.0 Hz, 1H), 0.95 – 0.87 (m, 2H), 0.73 – 0.66 (m, 2H). **<sup>13</sup>C NMR** (126 MHz, DMSO-*d*<sub>6</sub>) δ 148.8, 130.1, 7.9, 6.2. **HRMS (ESI)** calculated for C<sub>5</sub>H<sub>8</sub>N<sub>3</sub>: [M+H]<sup>+</sup> 110.0718, found: 110.0714. **FT/IR** (ν<sub>max</sub> (neat) cm<sup>-1</sup>) 3150, 3118, 3086, 2985, 2925, 2876, 2844, 2784, 1518, 1455, 1420, 1348, 1302, 1230, 1123, 1053, 1030, 993, 866. **R<sub>f</sub>** (1:1-hexanes:ethylacetate): 0.24.

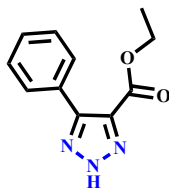

**Ethyl 5-phenyl-2H-1,2,3-triazole-4-carboxylate (9)**<sup>4</sup> was obtained from ethyl 3-phenylpropioate (3 mmol) and trimethylsilyl azide and purified by flash column chromatography as a yellow liquid that solidifies when given sufficient time in 92% yield (597 mg). **<sup>1</sup>H NMR** (500 MHz, Chloroform-*d*)  $\delta$  13.90 (s, 1H), 7.99 – 7.69 (m, 2H), 7.59 – 7.32 (m, 3H), 4.39 (q,  $J = 7.1$  Hz, 2H), 1.32 (t,  $J = 7.1$  Hz, 3H). **<sup>13</sup>C NMR** (126 MHz, Chloroform-*d*)  $\delta$  161.1, 146.8, 134.6, 129.8, 129.4, 128.5, 61.9, 14.2. **HRMS (ESI)** calculated for C<sub>11</sub>H<sub>12</sub>N<sub>3</sub>O<sub>2</sub>: [M+H]<sup>+</sup> 218.0930, found: 218.0930. **FT/IR** ( $\nu_{\text{max}}$  (neat) cm<sup>-1</sup>) 3169, 3113, 3078, 3027, 3005, 2978, 2937, 2836, 1718, 1582, 1480, 1442, 1388, 1376, 1320, 1307, 1243, 1222, 1173, 1148, 1087, 922, 839. **R<sub>f</sub>** (1:1-hexanes:ethylacetate): 0.22.

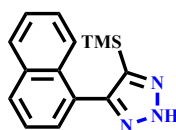

**4-(Naphthalen-1-yl)-5-(trimethylsilyl)-2H-1,2,3-triazole (10)** was obtained from trimethyl(naphthalen-1-ylethynyl)silane (3 mmol) and trimethylsilyl azide and purified by recrystallization as an off-white solid (m.p. 150-153 °C) in 62% yield (496 mg). **<sup>1</sup>H NMR** (399 MHz, Chloroform-*d*)  $\delta$  13.66 (s, 1H), 7.97 – 7.83 (m, 2H), 7.67 (d,  $J = 8.2$  Hz, 1H), 7.57 – 7.37 (m, 4H), 0.03 (s, 9H). **<sup>13</sup>C NMR** (100 MHz, Chloroform-*d*)  $\delta$  151.6, 135.4, 133.6, 133.2, 129.9, 129.2, 128.7, 128.2, 126.4, 126.3, 126.1, 124.9, -1.1. **HRMS (ESI)** calculated for C<sub>15</sub>H<sub>18</sub>N<sub>3</sub>Si: [M+H]<sup>+</sup> 268.1270, found: 268.1272. **FT/IR** ( $\nu_{\text{max}}$  (neat) cm<sup>-1</sup>) 3116, 3056, 2945, 2897, 2812, 2781, 1593, 1537, 1385, 1304, 1250, 1180, 961, 834. **R<sub>f</sub>** (1:1-hexanes:ethylacetate): 0.30.

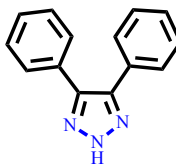

**4,5-Diphenyl-2H-1,2,3-triazole (11)**<sup>1</sup> was obtained from diphenylacetylene (5 mmol) and trimethylsilyl azide and purified by recrystallization as a white solid in 84% yield (927 mg). **<sup>1</sup>H NMR** (500 MHz, DMSO-*d*<sub>6</sub>)  $\delta$  7.50 (d,  $J = 7.0$  Hz, 4H), 7.47 – 7.32 (m, 6H). **<sup>13</sup>C NMR** (126 MHz, DMSO-*d*<sub>6</sub>)  $\delta$  143.0, 131.2, 128.7, 128.2, 127.9. **HRMS (ESI)** calculated for C<sub>14</sub>H<sub>12</sub>N<sub>3</sub>: [M+H]<sup>+</sup> 222.1031, found: 222.1030. **FT/IR** ( $\nu_{\text{max}}$  (neat) cm<sup>-1</sup>) 3088, 3064, 3019, 2987, 2921, 2884, 2834, 2808, 2748, 1604, 1584, 1516, 1490, 1441, 1382, 1227, 1210, 1121, 998, 910, 855. **R<sub>f</sub>** (1:1-hexanes:ethylacetate): 0.38.

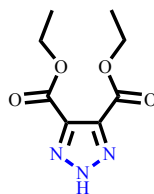

**Diethyl 2H-1,2,3-triazole-4,5-dicarboxylate (12)**<sup>5</sup> was obtained from dimethyl acetylenedicarboxylate (1 mmol) and trimethylsilyl azide purified by flash column chromatography as a pale yellow oil in 97% yield (206 mg). **<sup>1</sup>H NMR** (400 MHz, Chloroform-*d*)  $\delta$  4.46 (q,  $J = 7.4$  Hz, 4H), 1.40 (t,  $J = 7.4$  Hz, 6H). **<sup>13</sup>C NMR** (100 MHz, Chloroform-*d*)  $\delta$  160.2, 138.8, 62.6, 14.2. **HRMS (ESI)** calculated for C<sub>8</sub>H<sub>12</sub>N<sub>3</sub>O<sub>4</sub>: [M+H]<sup>+</sup> 214.0828, found: 214.0834. **FT/IR** ( $\nu_{\text{max}}$  (neat) cm<sup>-1</sup>) 3186, 2985, 2938, 2906, 2872, 1731, 1574, 1500, 1472, 1428, 1300, 1222, 1084, 1013, 988, 856, 831. **R<sub>f</sub>** (1:1-hexanes:ethylacetate): 0.22.

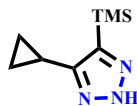

**4-Cyclopropyl-5-(trimethylsilyl)-2H-1,2,3-triazole (13)**<sup>6</sup> was obtained from (cyclopropylethynyl)-trimethylsilane (3 mmol) and trimethylsilyl azide and purified by recrystallization as off-white solid in 33% yield (180 mg). <sup>1</sup>H NMR (400 MHz, Chloroform-*d*) δ 1.89 (tt, *J* = 8.2, 5.1 Hz, 1H), 1.05 – 0.91 (m, 4H), 0.39 (s, 9H). <sup>13</sup>C NMR (126 MHz, Chloroform-*d*) δ 154.3, 134.9, 7.9, 7.2, -1.0. HRMS (ESI) calculated for C<sub>8</sub>H<sub>16</sub>N<sub>3</sub>Si: [M+H]<sup>+</sup> 182.1113, found: 182.1116. FT/IR (ν<sub>max</sub> (neat) cm<sup>-1</sup>) 3100, 3053, 3002, 2960, 2906, 2781, 2649, 1543, 1348, 1327, 1258, 1176, 1132, 1052, 1013, 999, 891, 835. R<sub>f</sub> (1:1-hexanes:ethylacetate): 0.34.

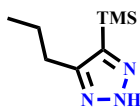

**4-Propyl-5-(trimethylsilyl)-2H-1,2,3-triazole (14)** was obtained from 1-trimethylsilyl-1-pentyne (3 mmol) and trimethylsilyl azide and purified by recrystallization as a white solid (m.p. 107-109°C) in 57% yield (312 mg). <sup>1</sup>H NMR (400 MHz, Chloroform-*d*) δ 12.78 (s, 1H), 2.77 – 2.69 (m, 2H), 1.72 (h, *J* = 7.4 Hz, 2H), 0.96 (t, *J* = 7.4 Hz, 3H), 0.35 (s, 9H). <sup>13</sup>C NMR (126 MHz, Chloroform-*d*) δ 153.0, 131.0, 28.2, 23.9, 14.0, -0.8. HRMS (ESI) calculated for C<sub>8</sub>H<sub>18</sub>N<sub>3</sub>Si: [M+H]<sup>+</sup> 184.1270, found: 184.1276. FT/IR (ν<sub>max</sub> (neat) cm<sup>-1</sup>) 3129, 3053, 2958, 2931, 2871, 1463, 1359, 1250, 1219, 1176, 1123, 1011, 839. R<sub>f</sub> (1:1-hexanes:ethylacetate): 0.35.

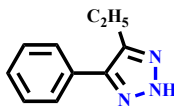

**4-Ethyl-5-phenyl-2H-1,2,3-triazole (15)**<sup>1</sup> was obtained from 1-phenyl-1-butyne (4 mmol) and trimethylsilyl azide and purified by recrystallization as a white crystalline solid in 92% yield (640 mg). <sup>1</sup>H NMR (399 MHz, Chloroform-*d*) δ 11.95 (s, 1H), 7.69 (d, *J* = 7.4 Hz, 2H), 7.46 (t, *J* = 7.4 Hz, 2H), 7.39 (t, *J* = 7.4 Hz, 1H), 2.94 (q, *J* = 7.5 Hz, 2H), 1.35 (t, *J* = 7.5 Hz, 3H). <sup>13</sup>C NMR (100 MHz, Chloroform-*d*) δ 144.1, 130.9, 128.9, 128.3, 127.6, 19.0, 13.4. HRMS (ESI) calculated for C<sub>10</sub>H<sub>12</sub>N<sub>3</sub>: [M+H]<sup>+</sup> 174.1026, found: 174.1031. FT/IR (ν<sub>max</sub> (neat) cm<sup>-1</sup>) 3078, 3006, 2975, 2935, 2880, 2639, 2574, 2515, 1818, 1598, 1475, 1448, 1247, 1217, 1076, 1046, 1023, 1217, 1009, 993, 923. R<sub>f</sub> (1:1-hexanes:ethylacetate): 0.34.

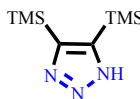

**4,5-Bis(trimethylsilyl)-1H-1,2,3-triazole (16)**<sup>7</sup> was obtained from 1,2-bis(trimethylsilyl)ethyne (3 mmol) and trimethylsilyl azide and purified by recrystallization as a white crystals in 61% yield (392 mg). <sup>1</sup>H NMR (600 MHz, Chloroform-*d*) δ 0.38 (pd, *J* = 3.9 Hz, 18H). <sup>13</sup>C NMR (151 MHz, Chloroform-*d*) δ 150.6, 139.7, -0.02. HRMS (ESI) calculated for C<sub>8</sub>H<sub>20</sub>N<sub>3</sub>Si<sub>2</sub>: [M+H]<sup>+</sup> 214.1196, found: 214.1200. FT/IR (ν<sub>max</sub> (neat) cm<sup>-1</sup>) 3110, 2953, 2867, 1412, 1251, 1213, 1143, 1104, 1071, 1014, 826. R<sub>f</sub> (1:1-hexanes:ethylacetate): 0.41.

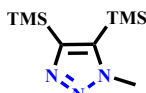

**1-Methyl-4,5-bis(trimethylsilyl)-1H-1,2,3-triazole (17)**<sup>7</sup> was obtained from overnight stirring of **16** (0.25 mmol), methyl iodide (0.375 mmol), and potassium carbonate (0.5 mmol) in 2 mL DMF after silica column purification in 82% yield (46.6 mg). <sup>1</sup>H NMR (500 MHz, Chloroform-*d*) δ 4.15 (s, 3H), 0.42 (s, 9H), 0.39 (s, 9H). <sup>13</sup>C NMR (126 MHz, Chloroform-*d*) δ 153.8, 140.2, 37.9, 0.8, 0.7. R<sub>f</sub> (1:1-hexanes:ethylacetate): 0.42.

# = 698 (s), 768

## Reference:

- 1 X.-J. Quan, Z.-H. Ren, Y.-Y. Wang and Z.-H. Guan, *Org. Lett.*, 2014, **16**, 5728–5731.
- 2 X. Wang, C. Kuang and Q. Yang, *Eur. J. Org. Chem.*, **2012**, 424–428.
- 3 J. Wen, L.-L. Zhu, Q.-W. Bi, Z.-Q. Shen, X.-X. Li, X. Li, Z. Wang and Z. Chen, *Chem. Eur. J.*, 2014, **20**, 974–978.
- 4 R. Hui, M. Zhao, M. Chen, Z. Ren and Z. Guan, *Chin. J. Chem.*, 2017, **35**, 1808–1812.
- 5 T. Hitomi and S. Kozima, *J. Organomet. Chem.*, 1977, **127**, 273–280.
- 6 L. Hu, C. Mück-Lichtenfeld, T. Wang, G. He, M. Gao and J. Zhao, *Chem. Eur. J.*, 2016, **22**, 911–915.
- 7 X. Wang, L. Zhang, D. Krishnamurthy, C. H. Senanayake and P. Wipf, *Org. Lett.*, 2010, **12**, 4632–4635.

# Microwave data and NMR spectra of 4-Phenyl-2H-1,2,3-triazole (1)

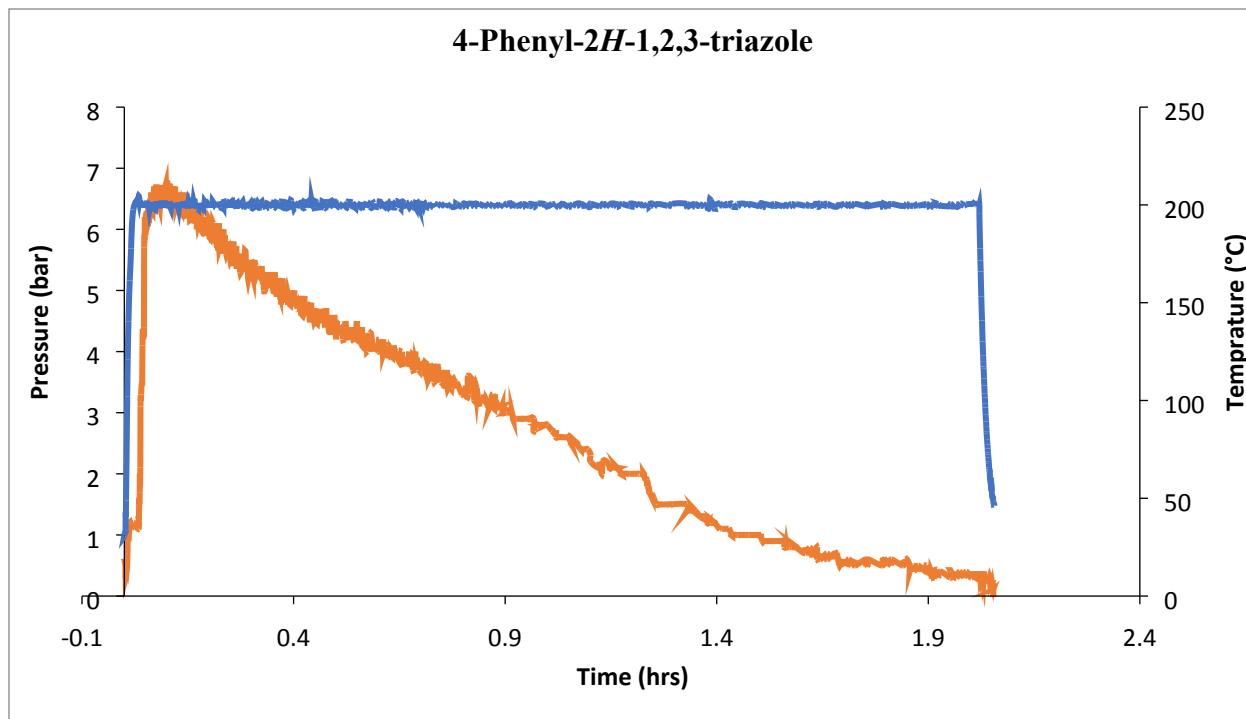

Proton-DMSO-d6

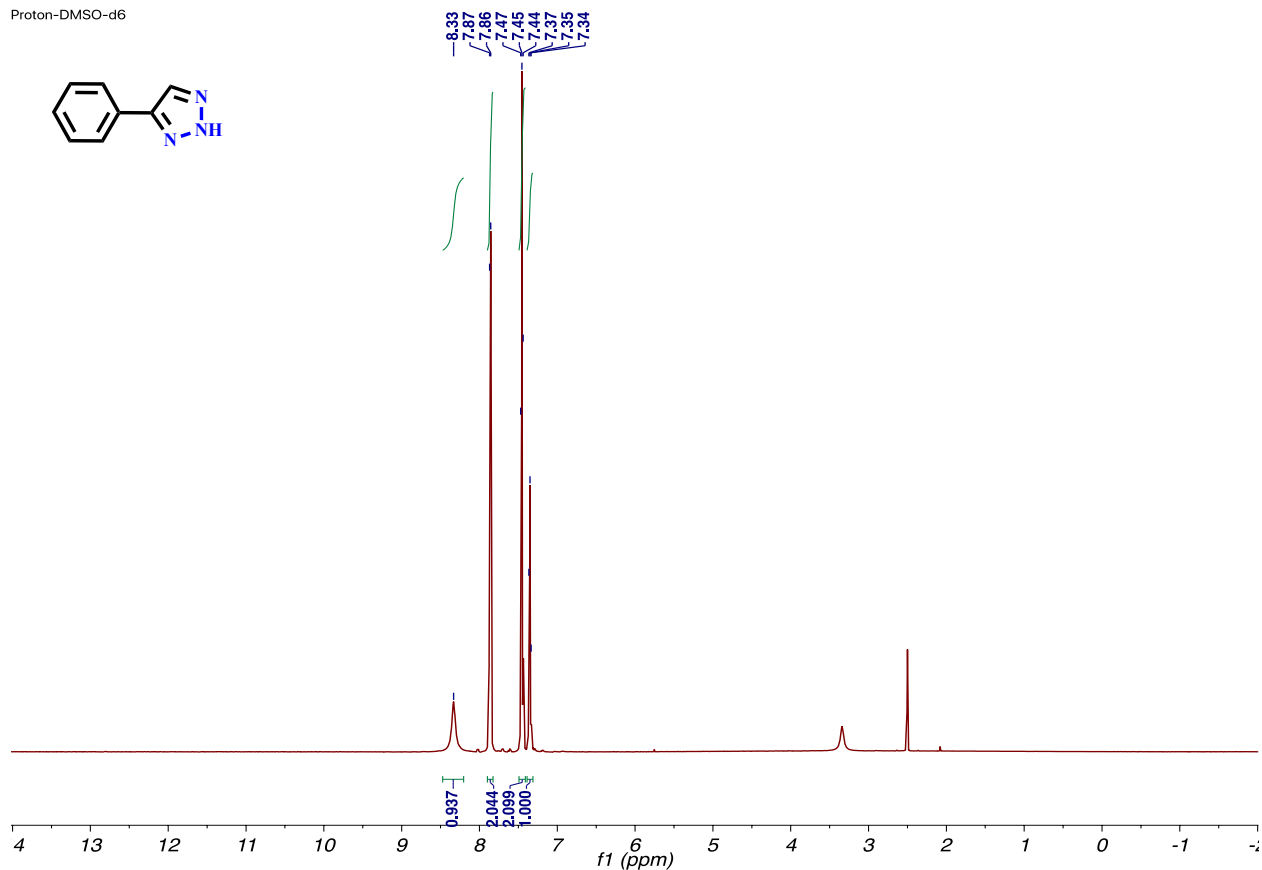



Carbon-DMSO-d6

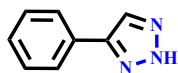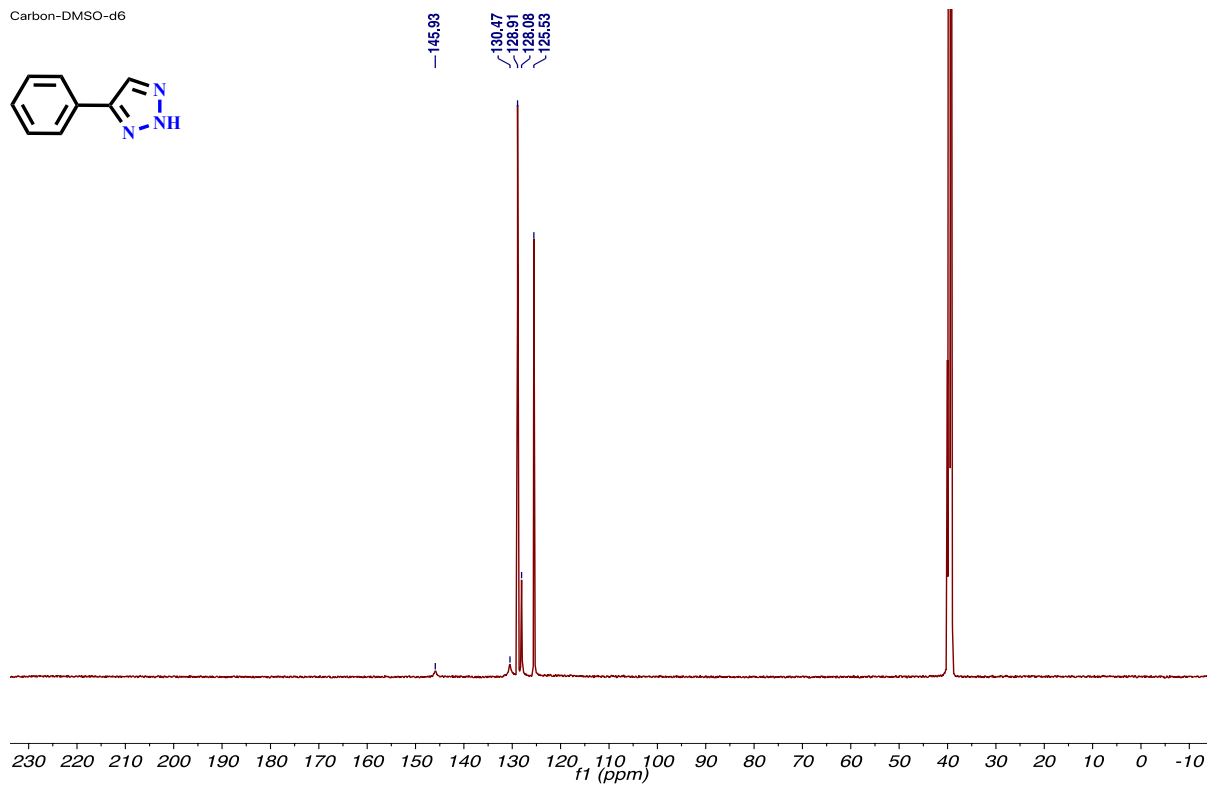

# Microwave data and NMR spectra of 4-(3-Methoxyphenyl)-2H-1,2,3-triazole (2)

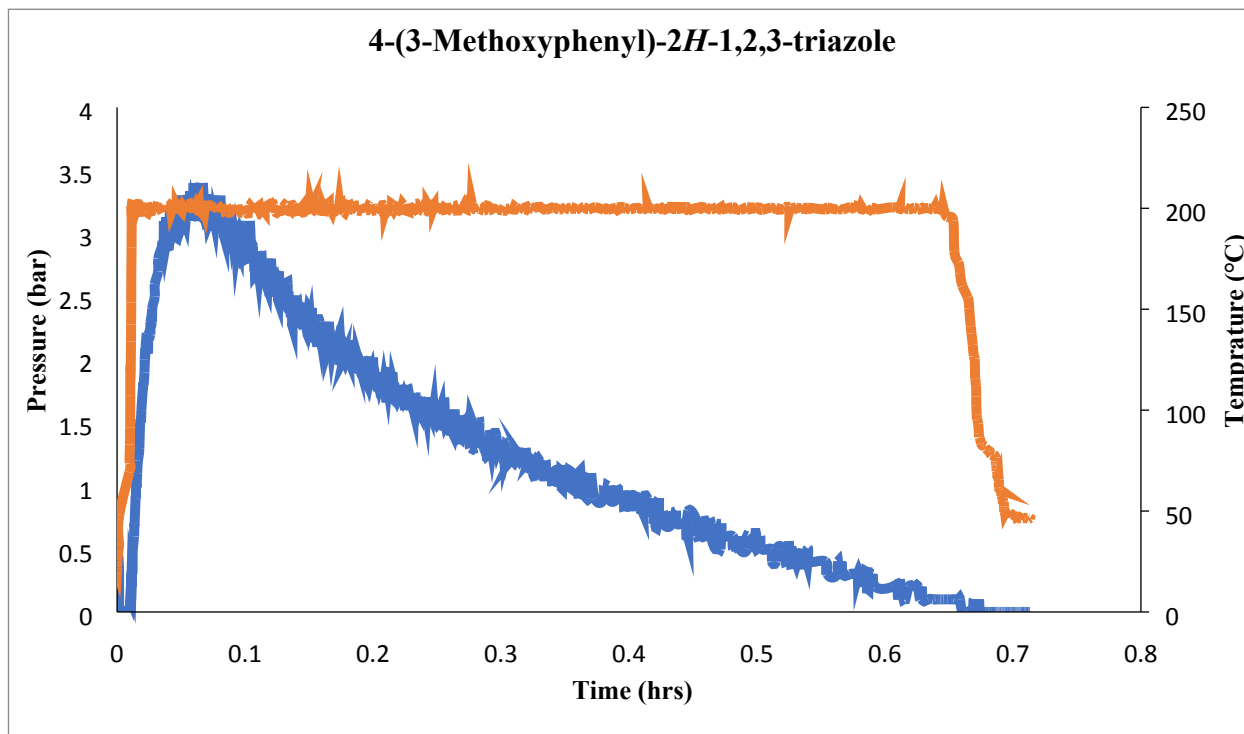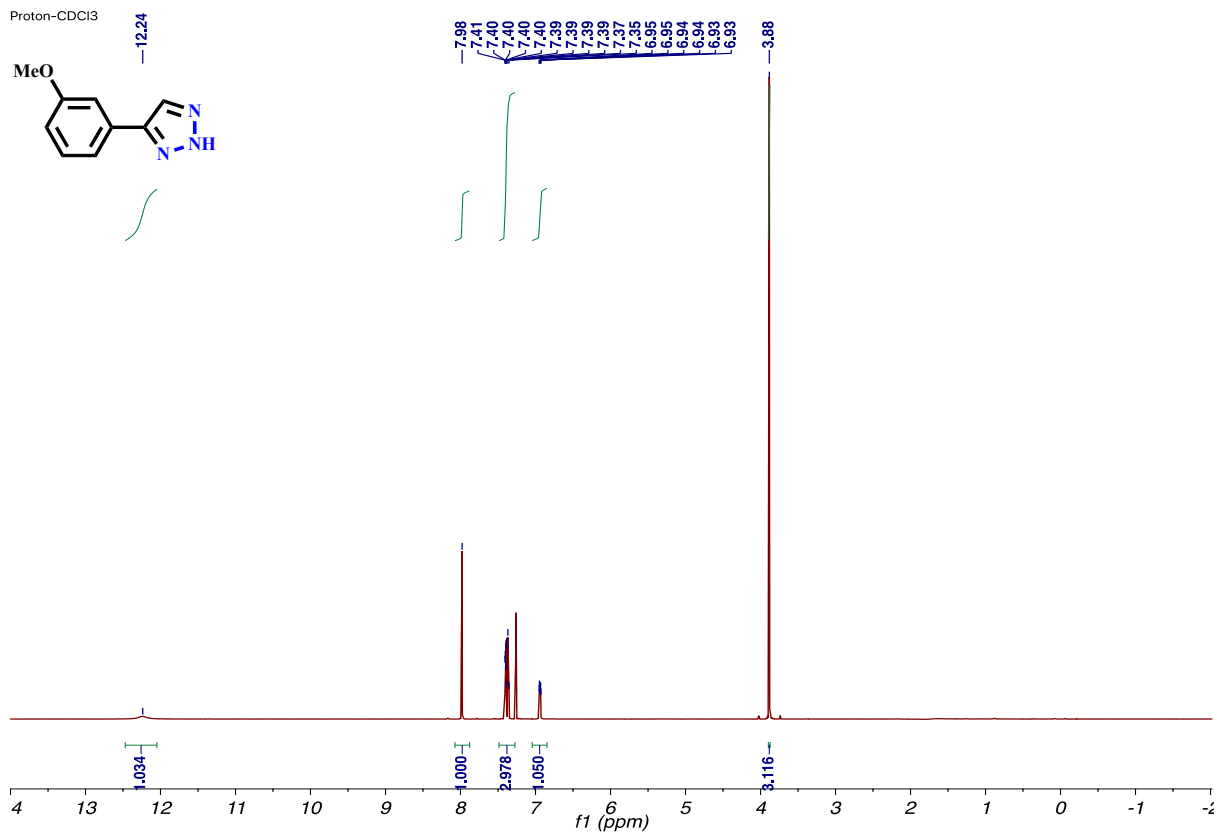

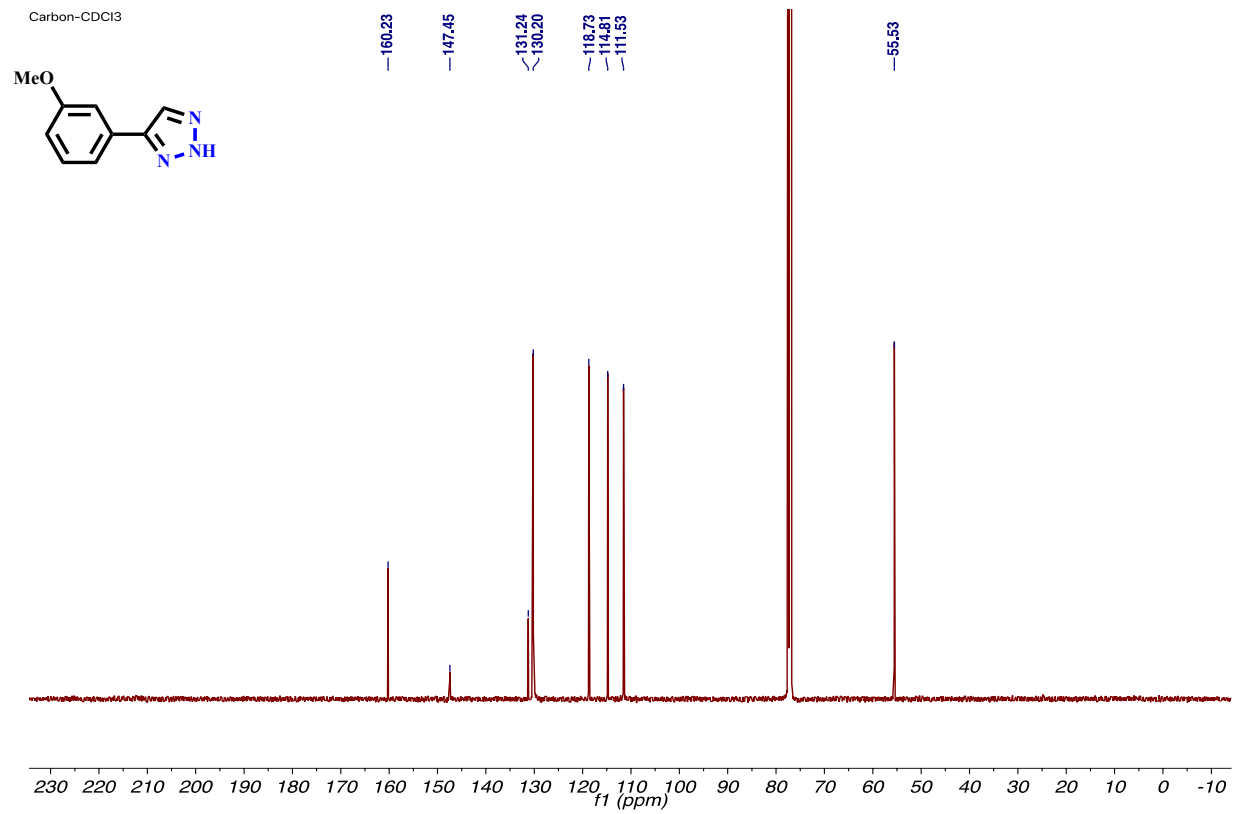

### Microwave data and NMR spectra of 4-(2H-1,2,3-Triazol-4-yl)benzonitrile (3)

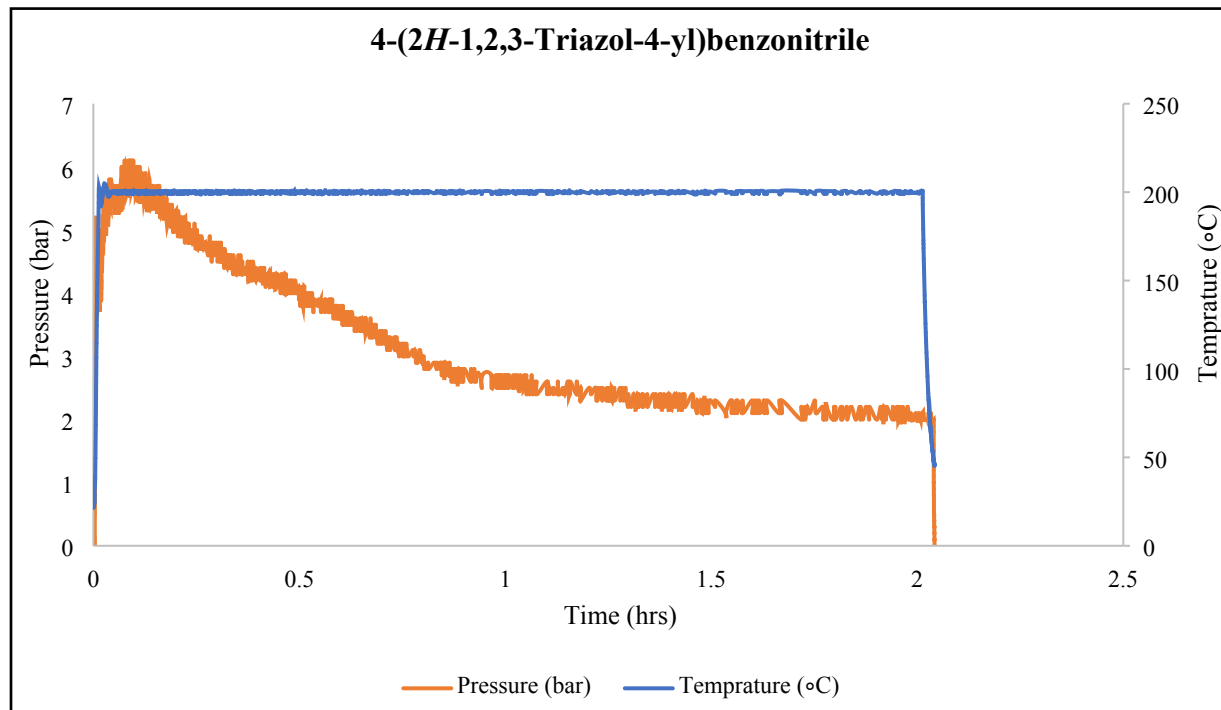

Proton-DMSO-d6

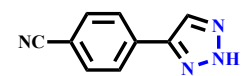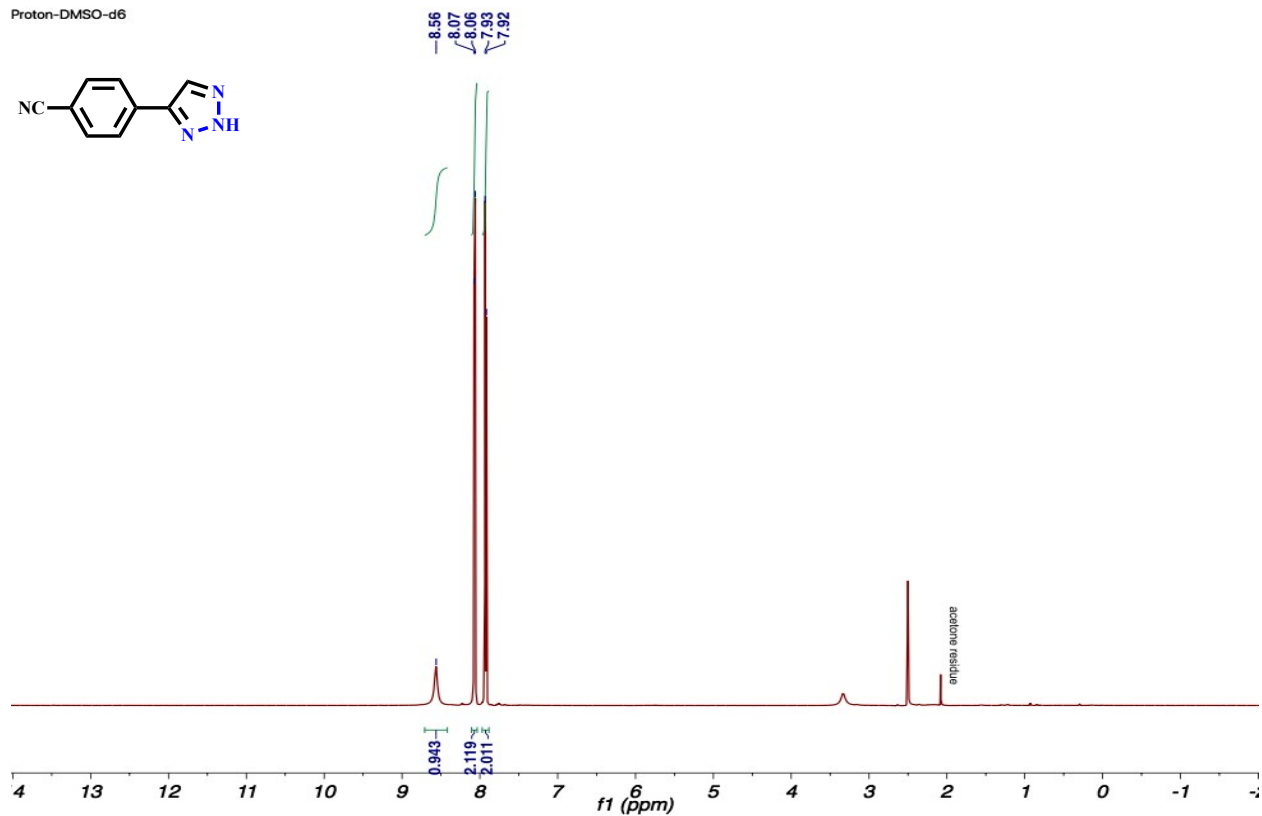

Carbon-DMSO-d6

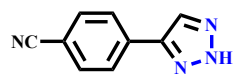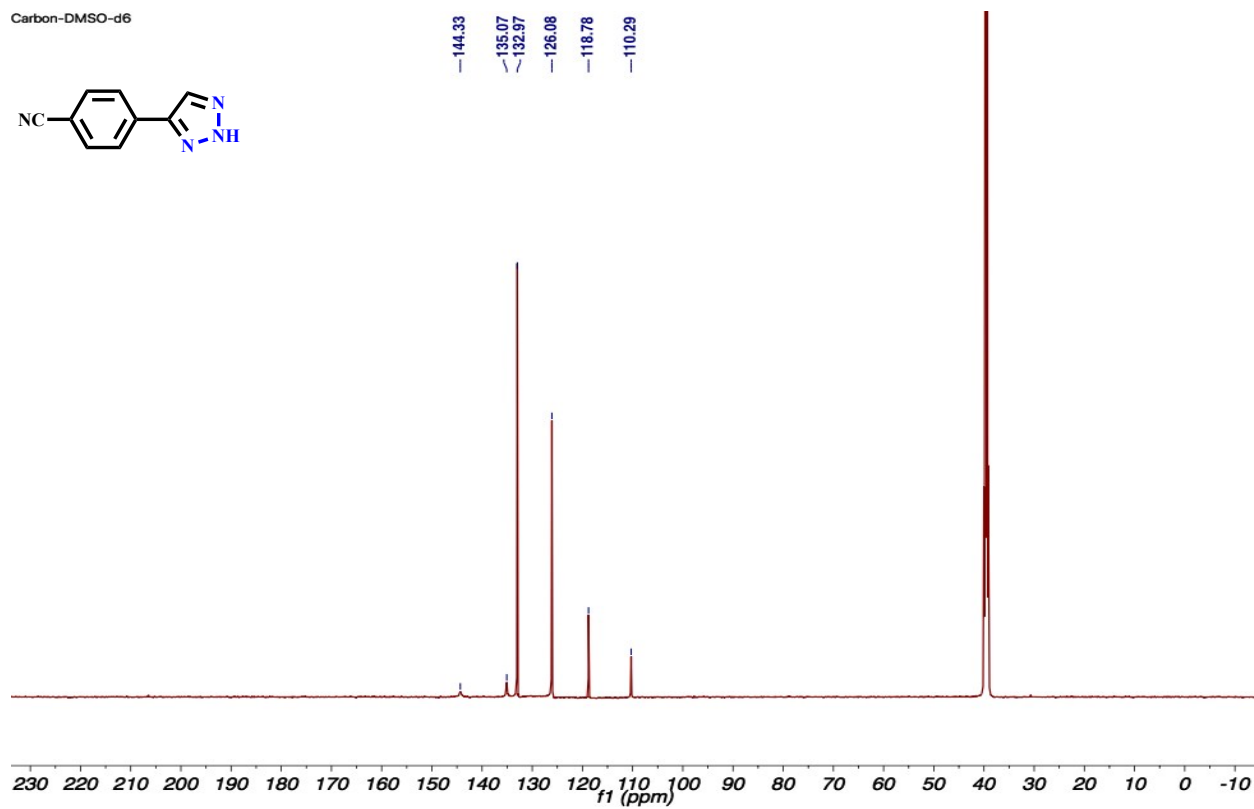

### Microwave data and NMR spectra of 4-(4-Fluorophenyl)-2H-1,2,3-triazole (4)

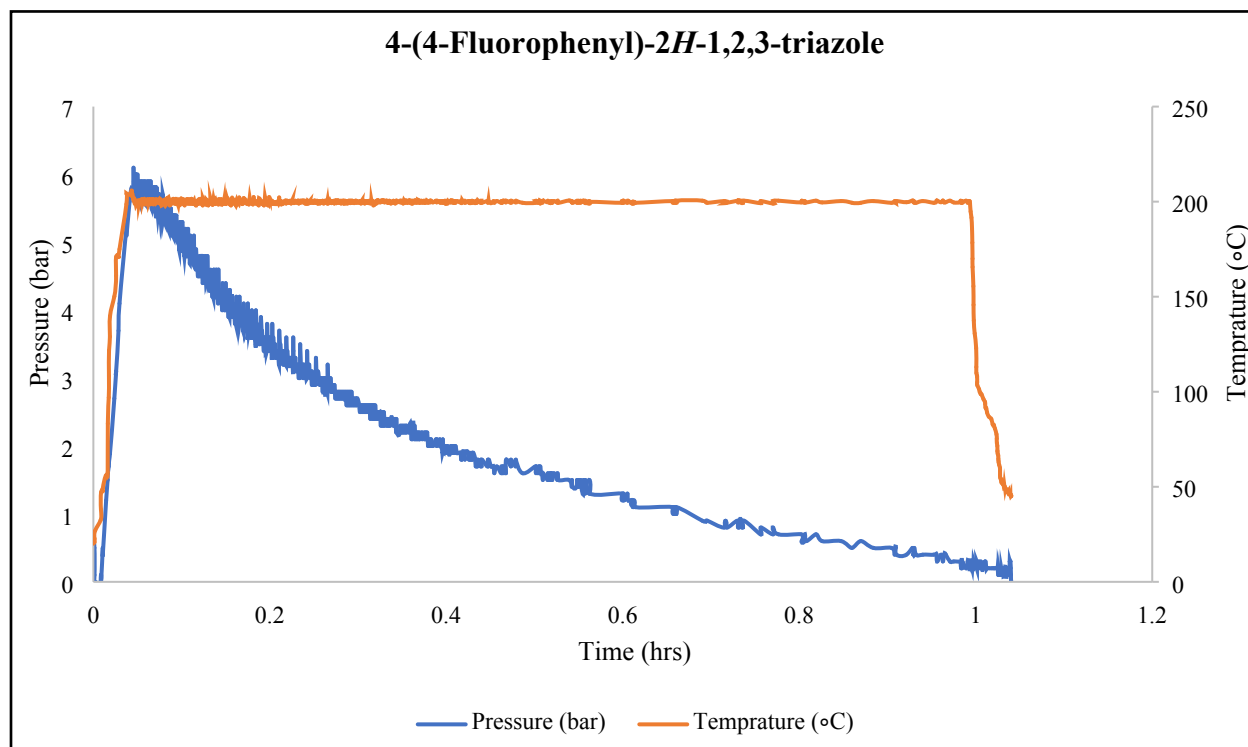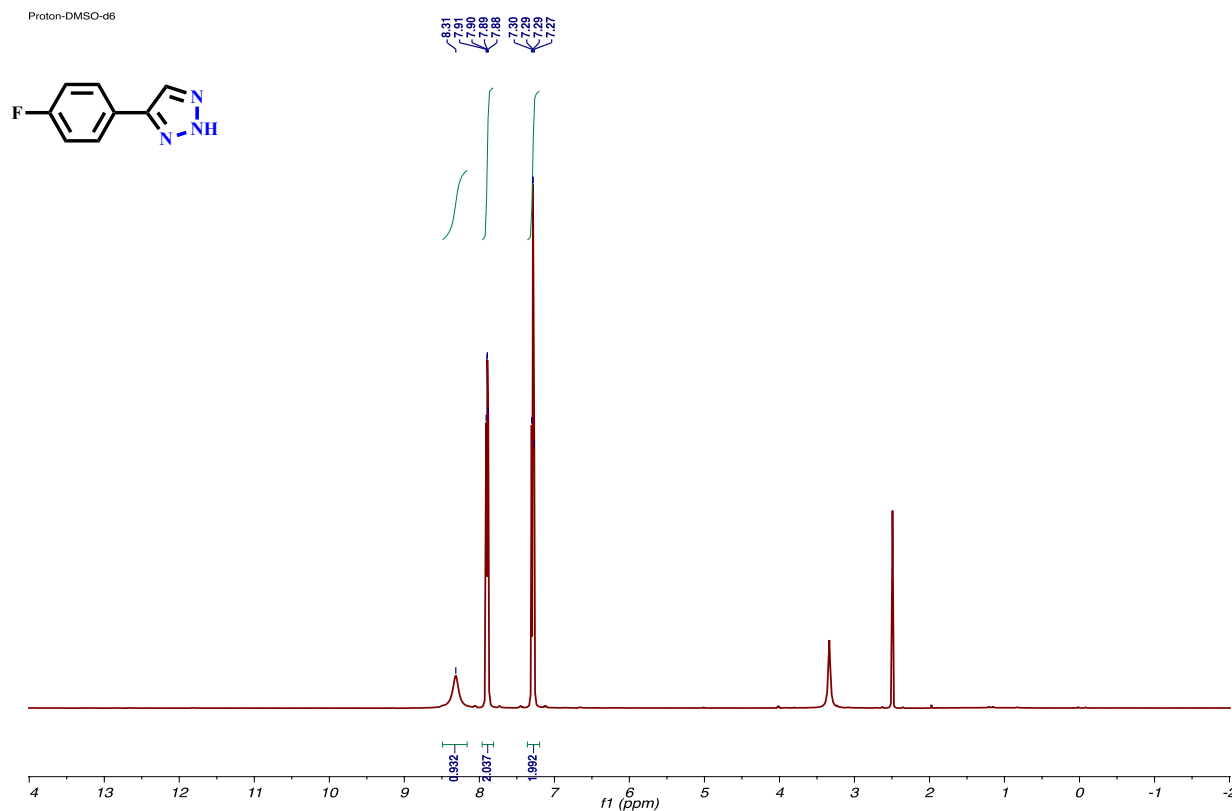

Carbon-DMSO-d6

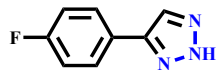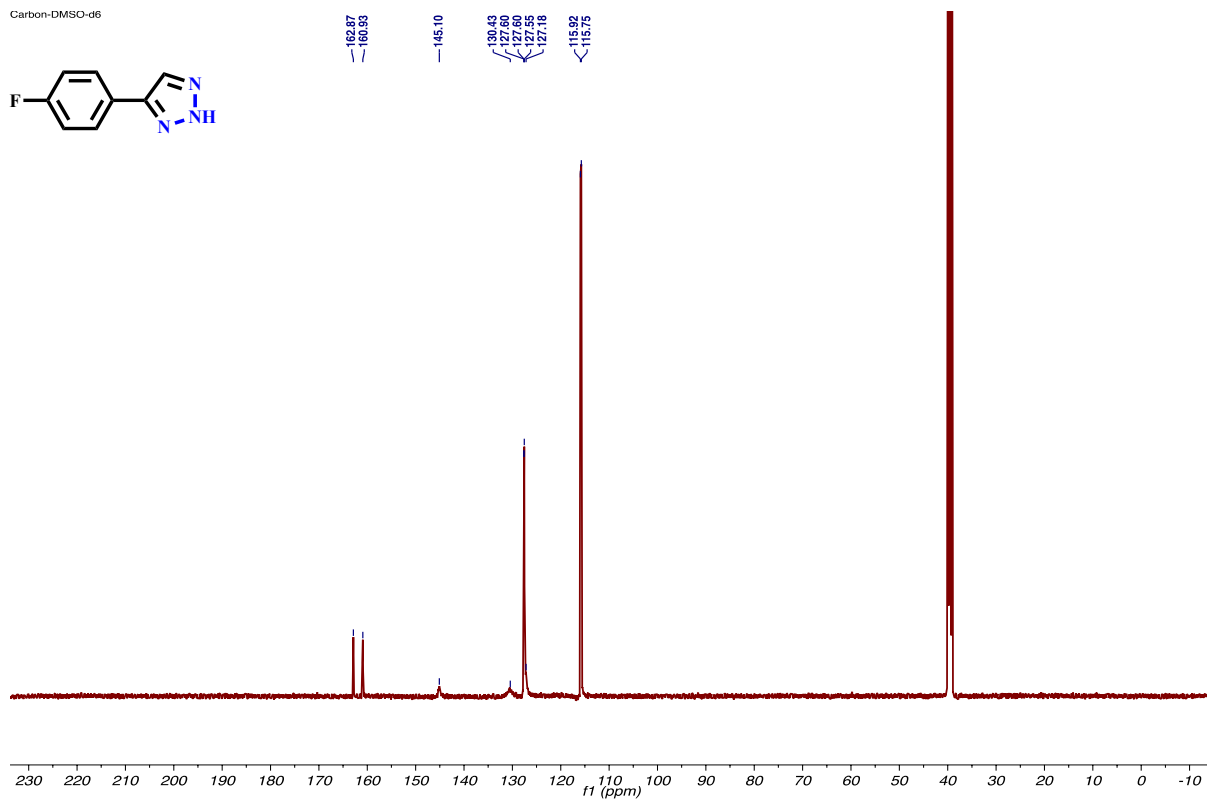

Fluorine-CFCIS as ref.

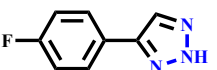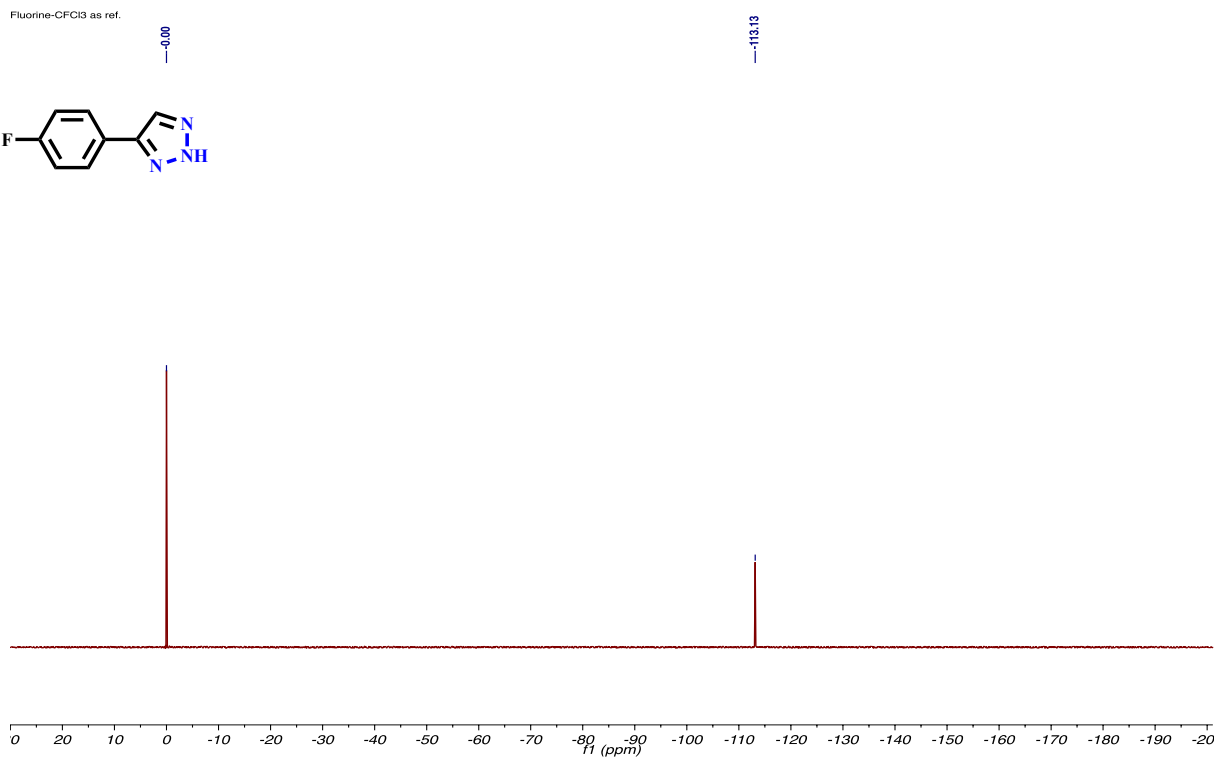

# Microwave data and NMR spectra of 4-(4-Chlorophenyl)-2H-1,2,3-triazole (5)

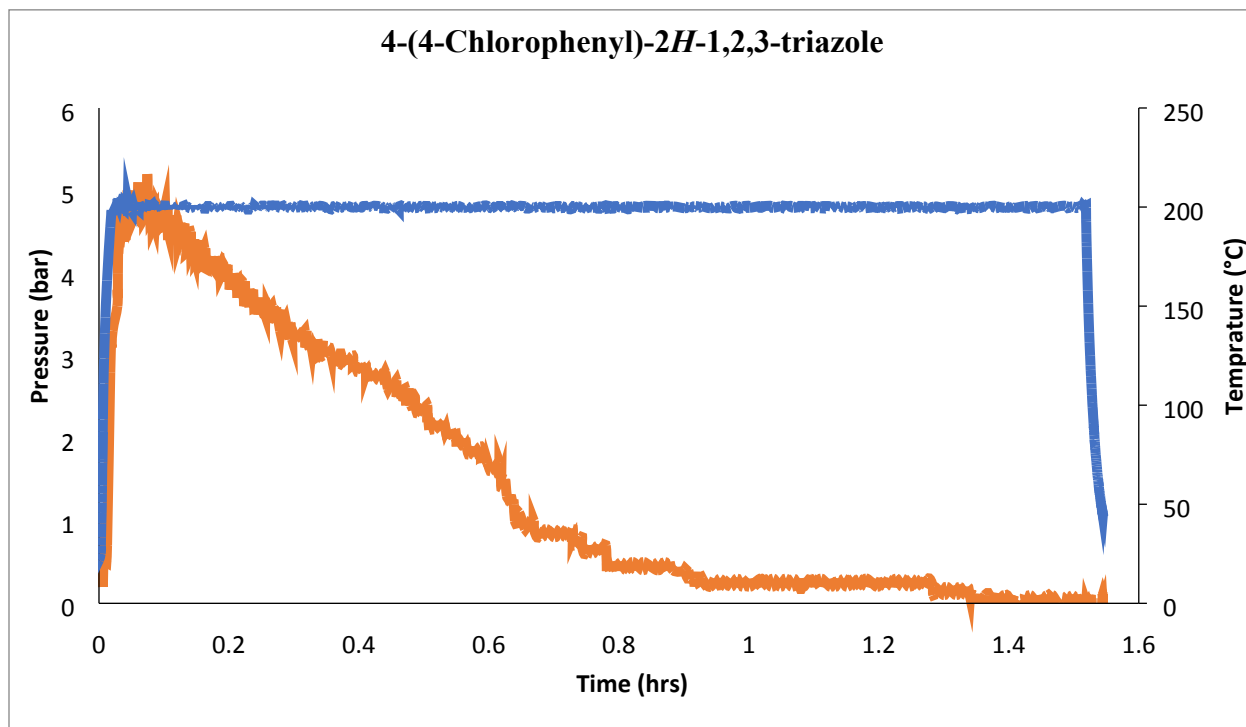

Proton-DMSO-d6

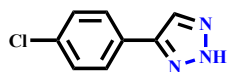

8.39  
7.90  
7.53

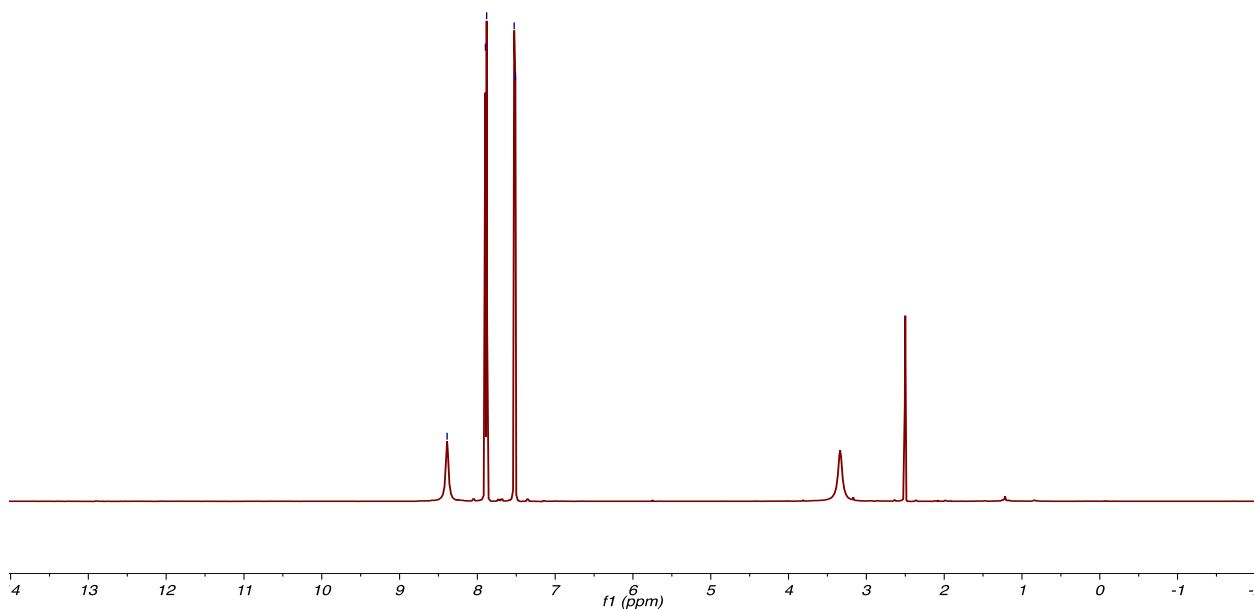



Carbon-DMSO-d6

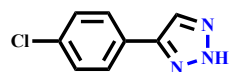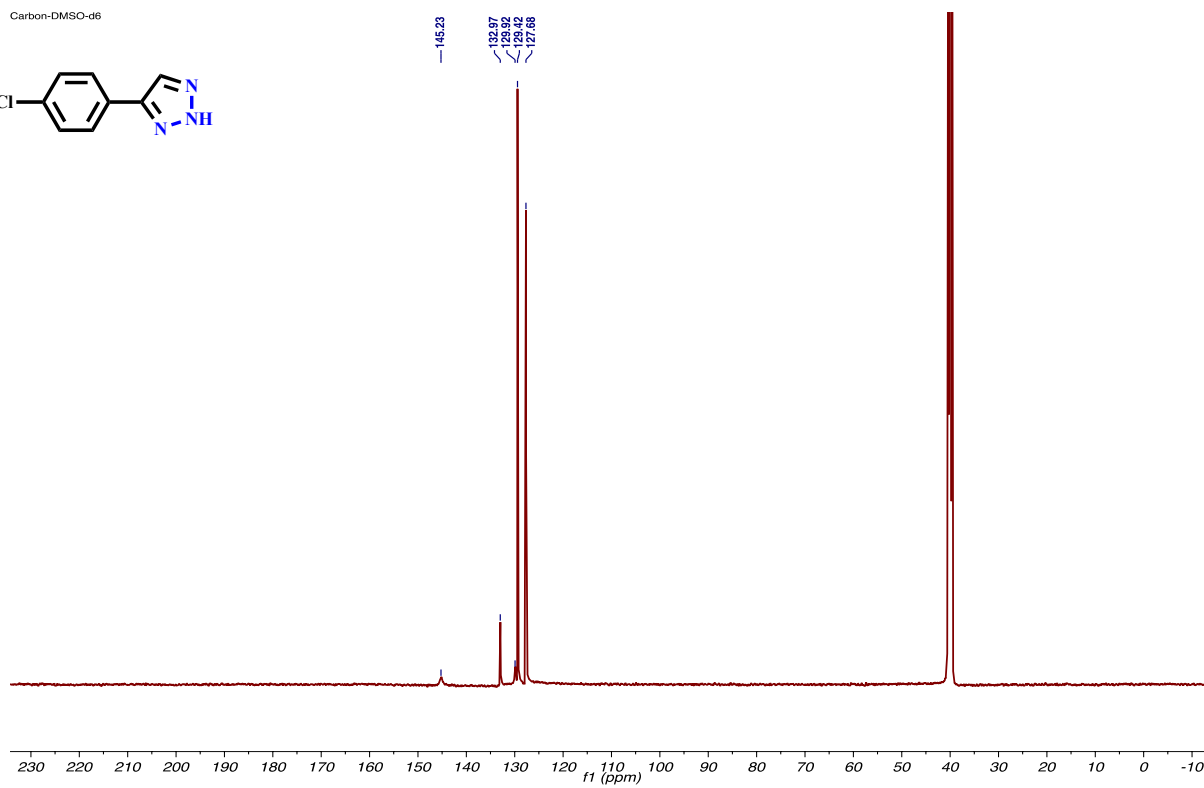

### Microwave data and NMR spectra of 4-(4-Bromophenyl)-2H-1,2,3-triazole (6)

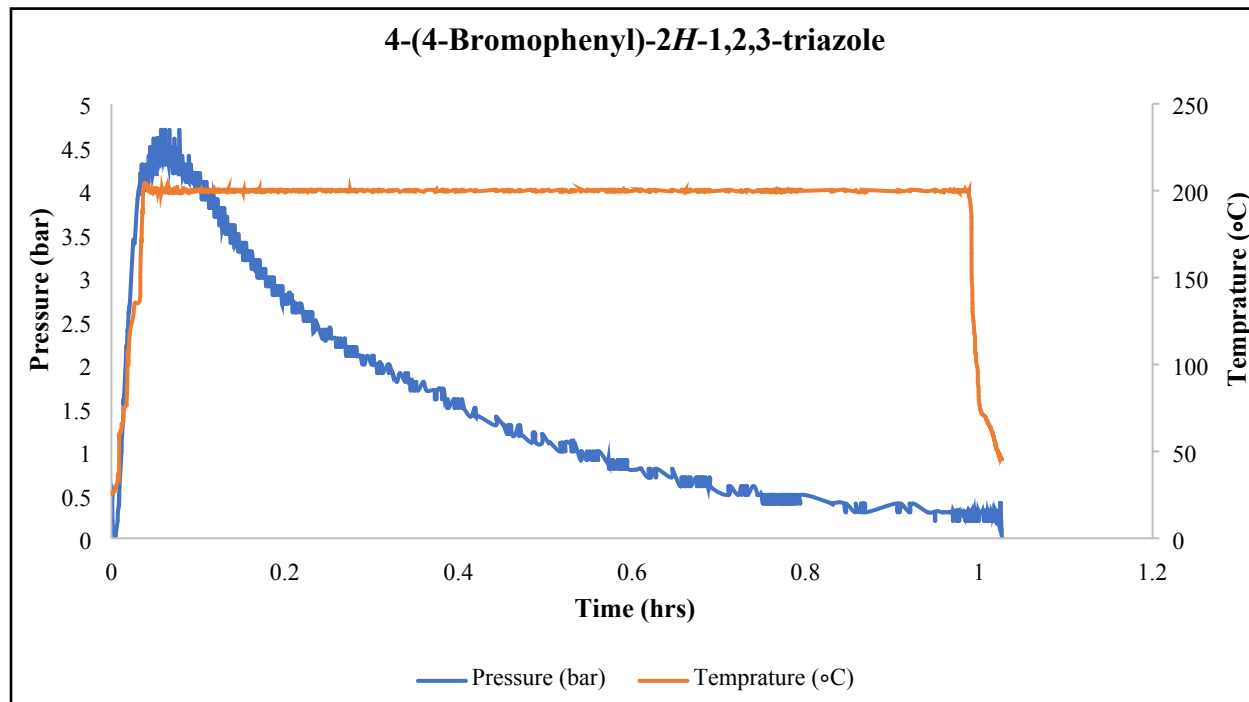

Proton-DMSO-d6

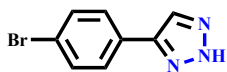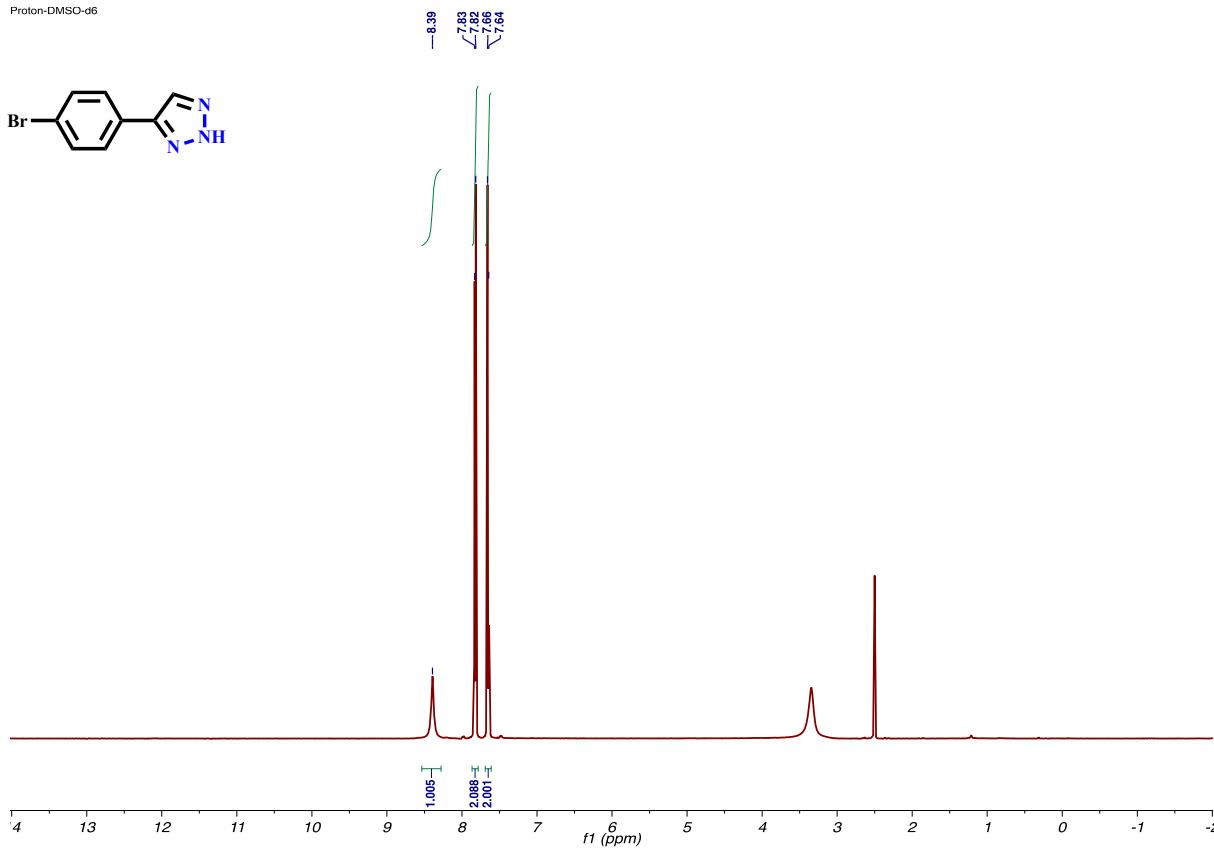

Carbon-DMSO-d6

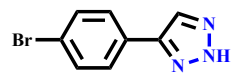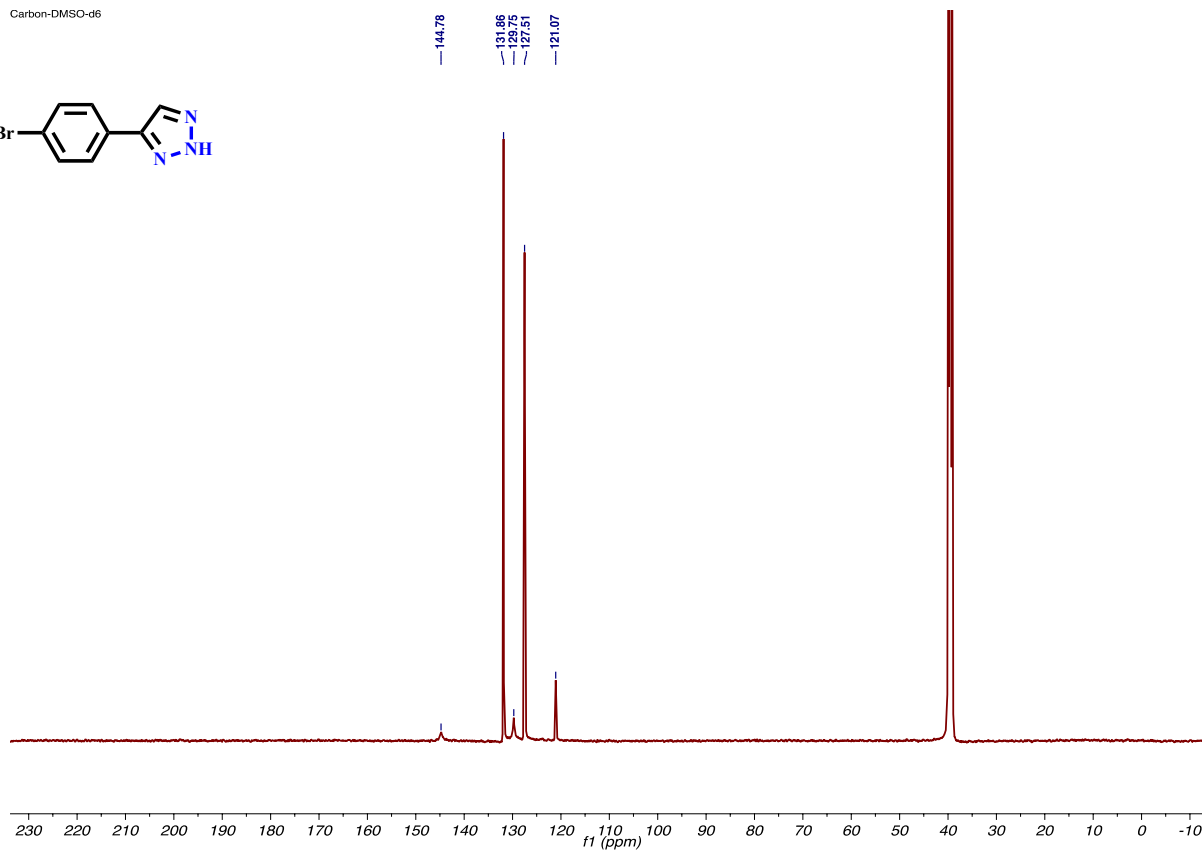

# Microwave data and NMR spectra of 4-(3,5-Difluorophenyl)-2H-1,2,3-triazole (7)

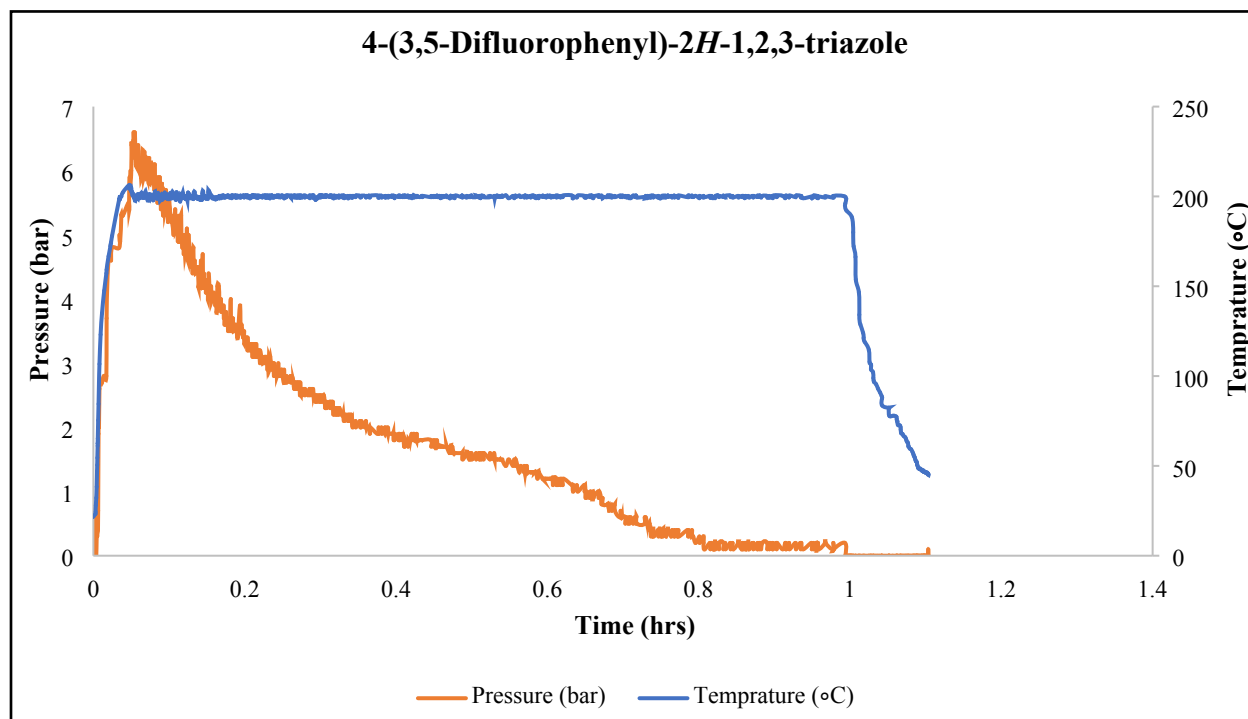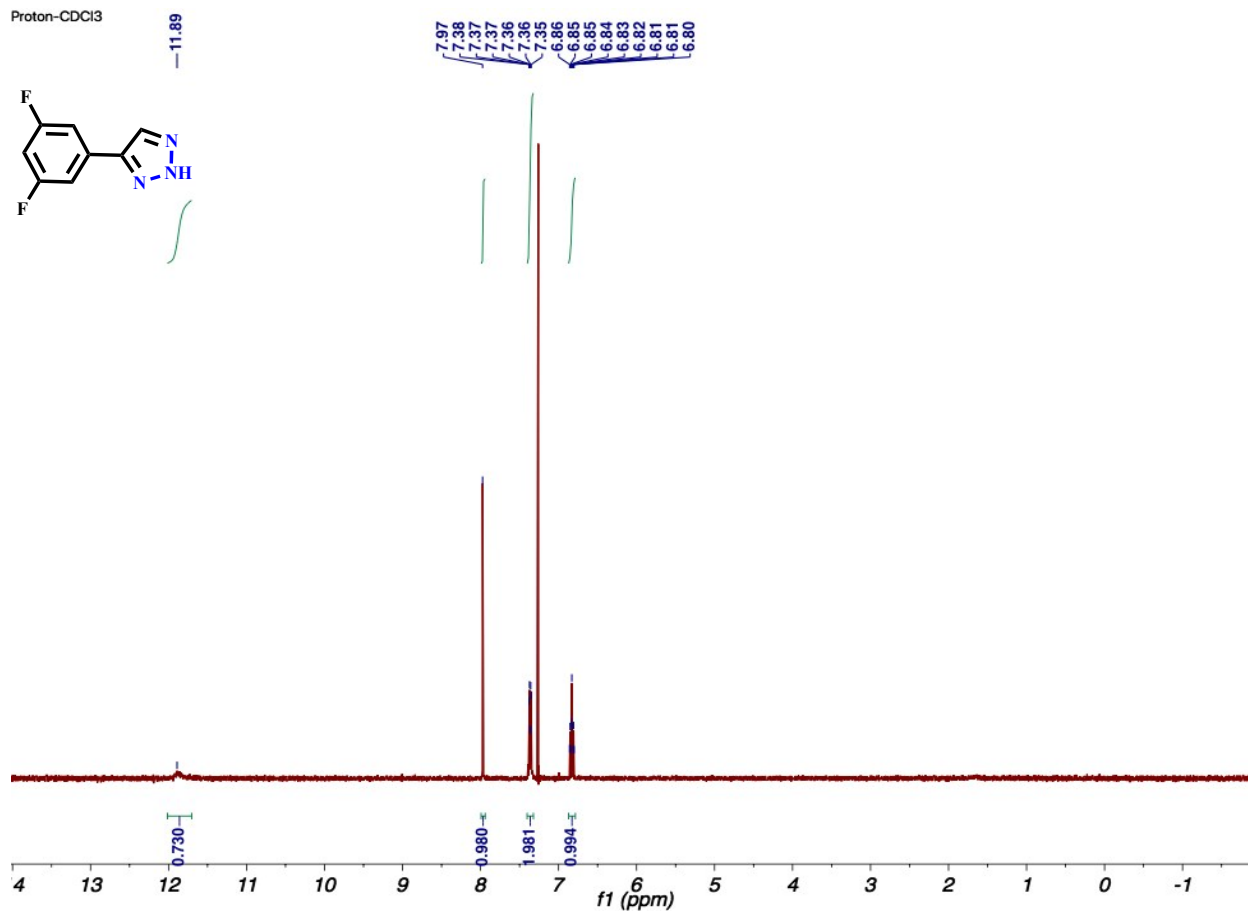

Carbon-CDCl<sub>3</sub>

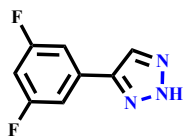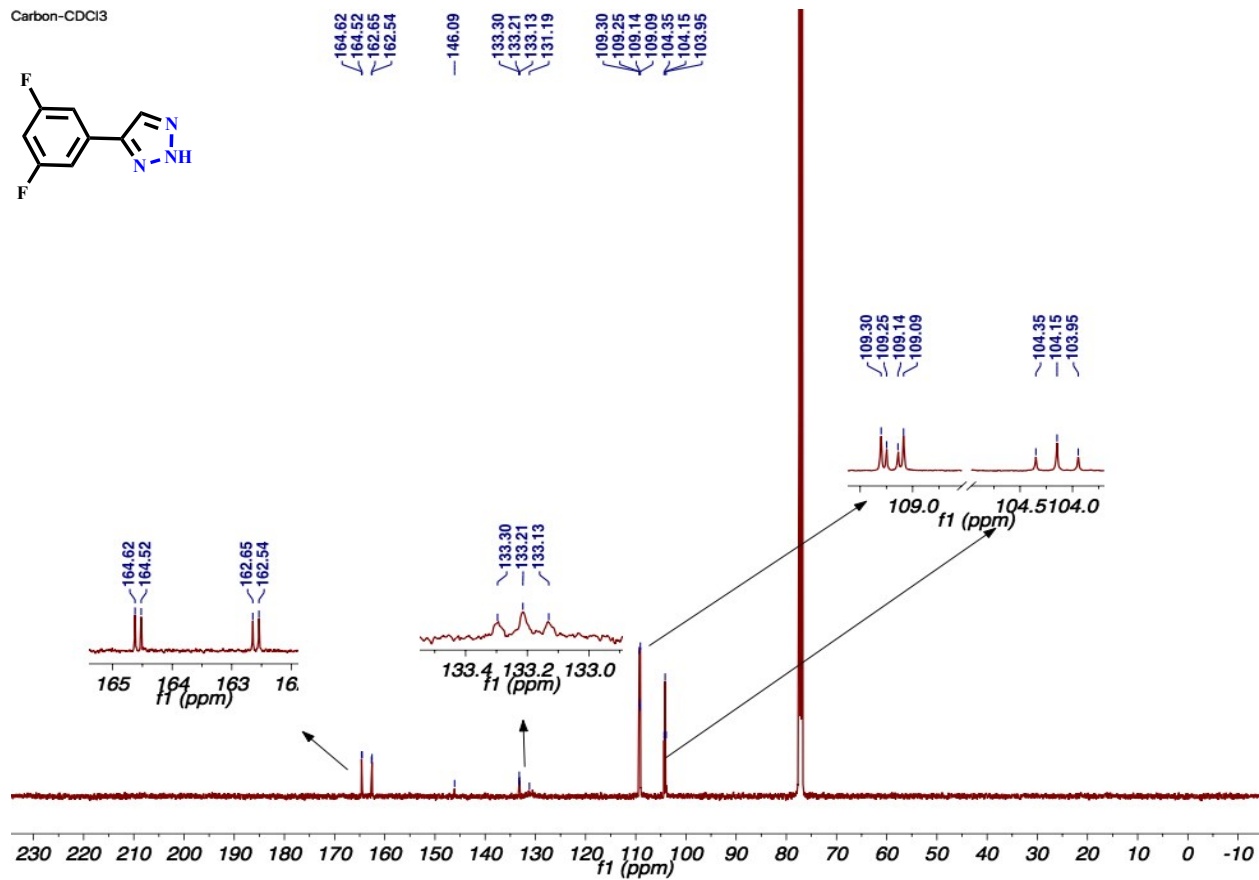

Fluorine-CFCl<sub>3</sub>

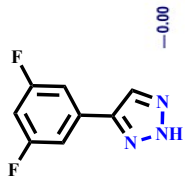

-0.00

109.43  
109.44  
109.46

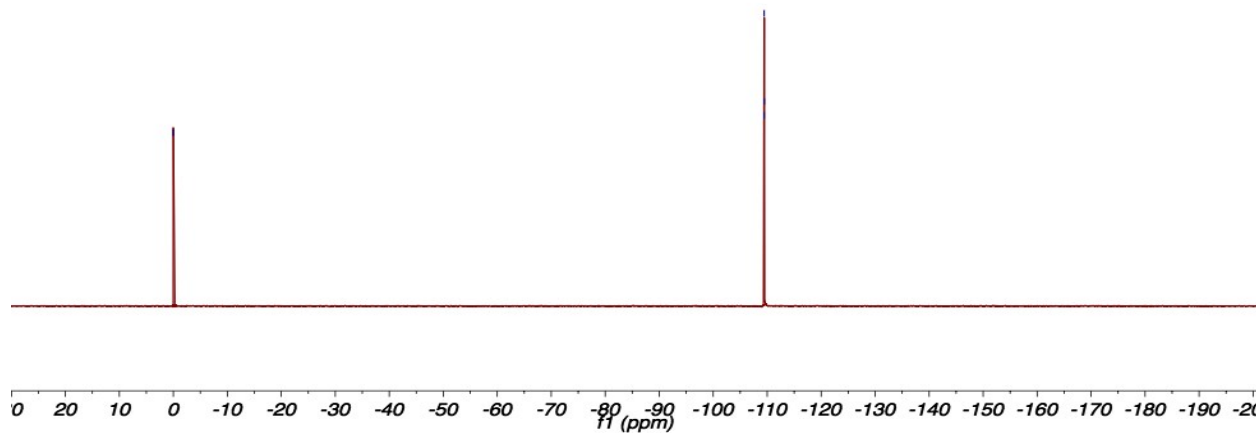

# Microwave data and NMR spectra of 4-Cyclopropyl-2H-1,2,3-triazole (8)

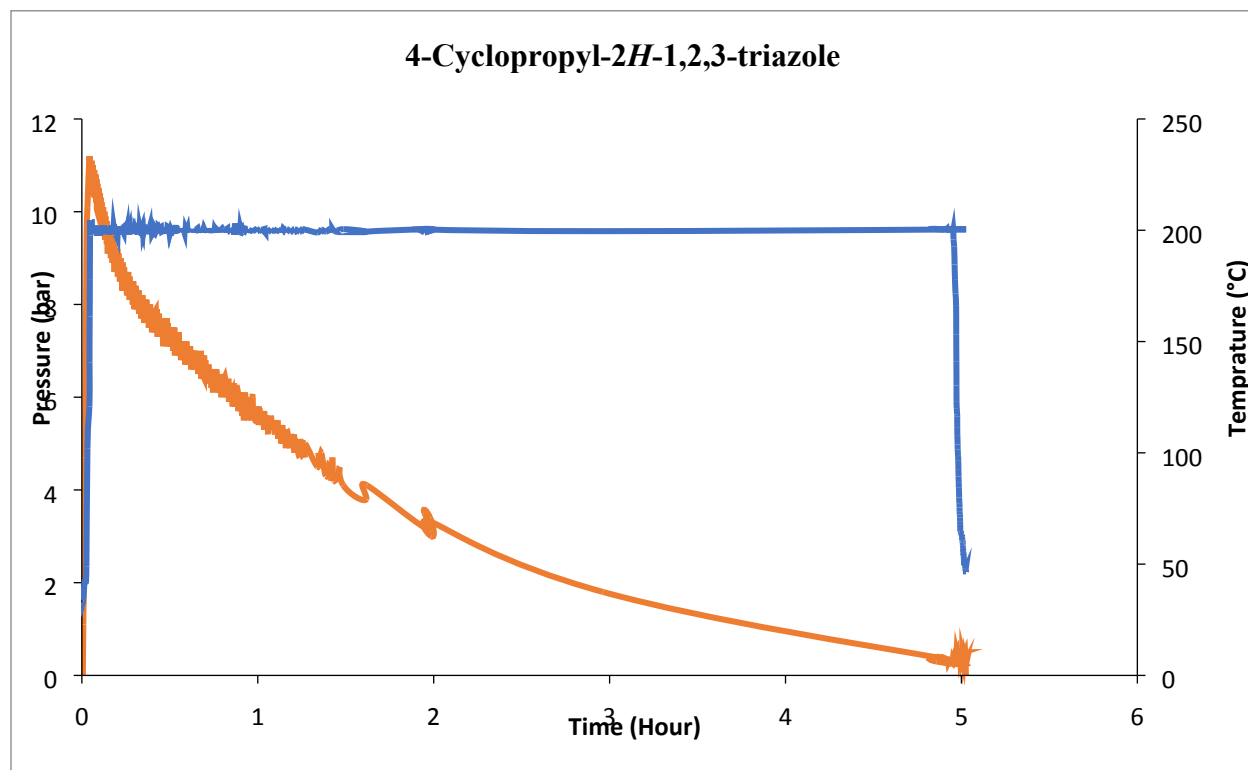

Proton-DMSO-d6

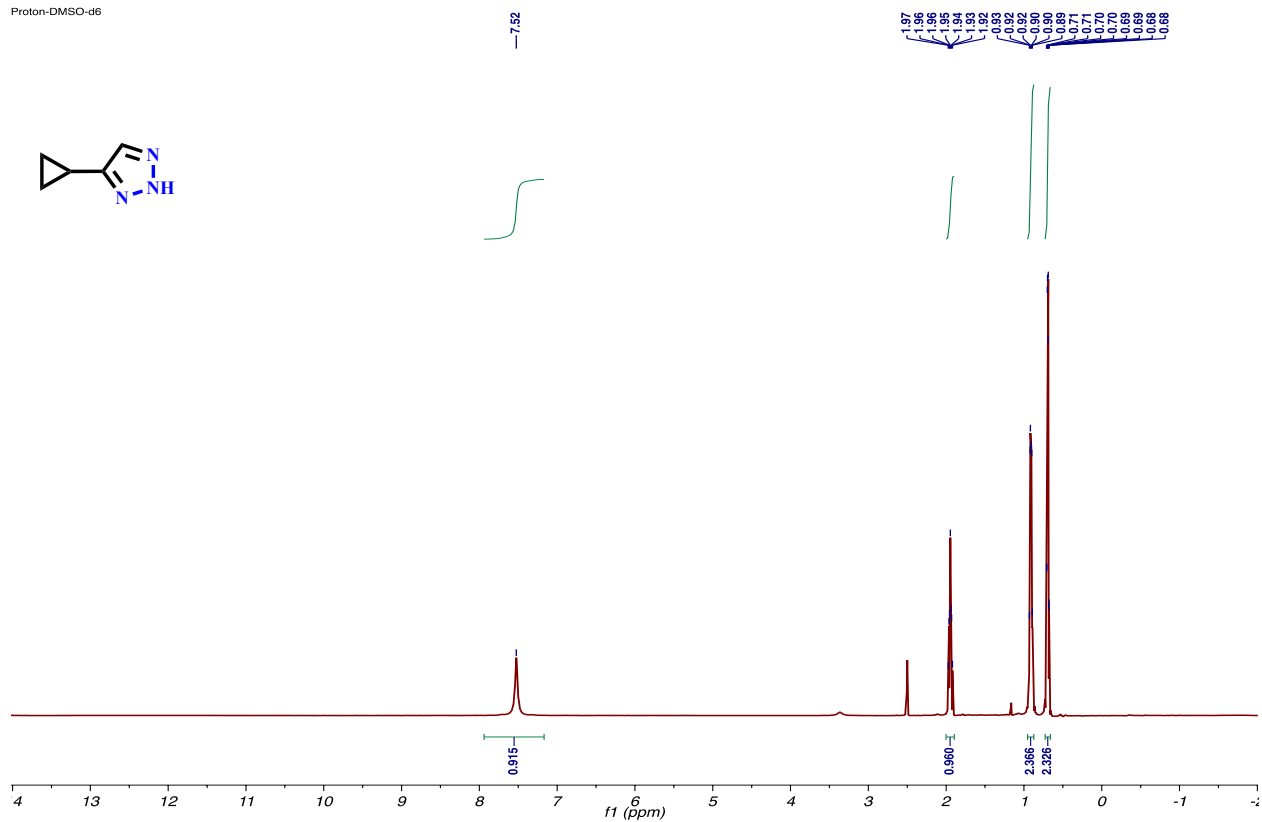

Carbon-DMSO-d6

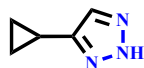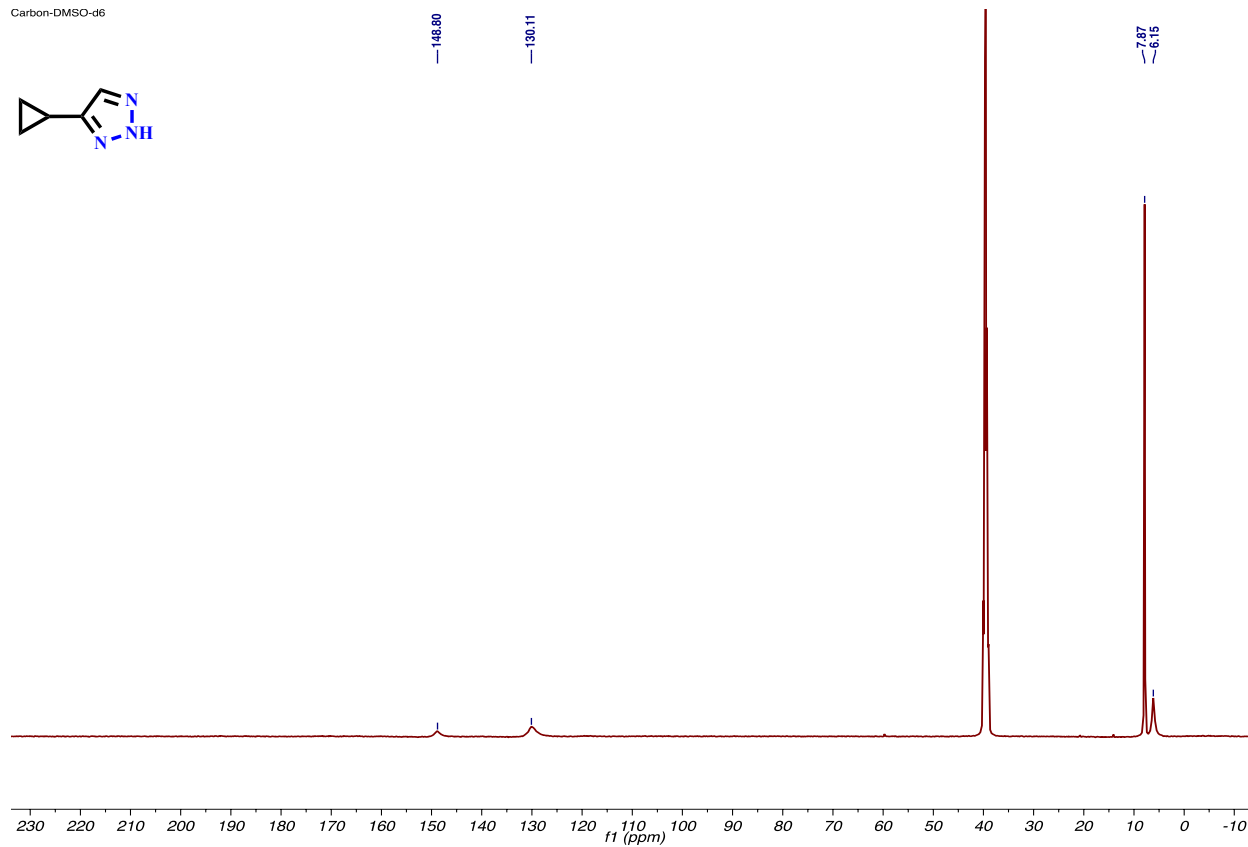



## Microwave data and NMR spectra of Ethyl 5-phenyl-2H-1,2,3-triazole-4-carboxylate (9)

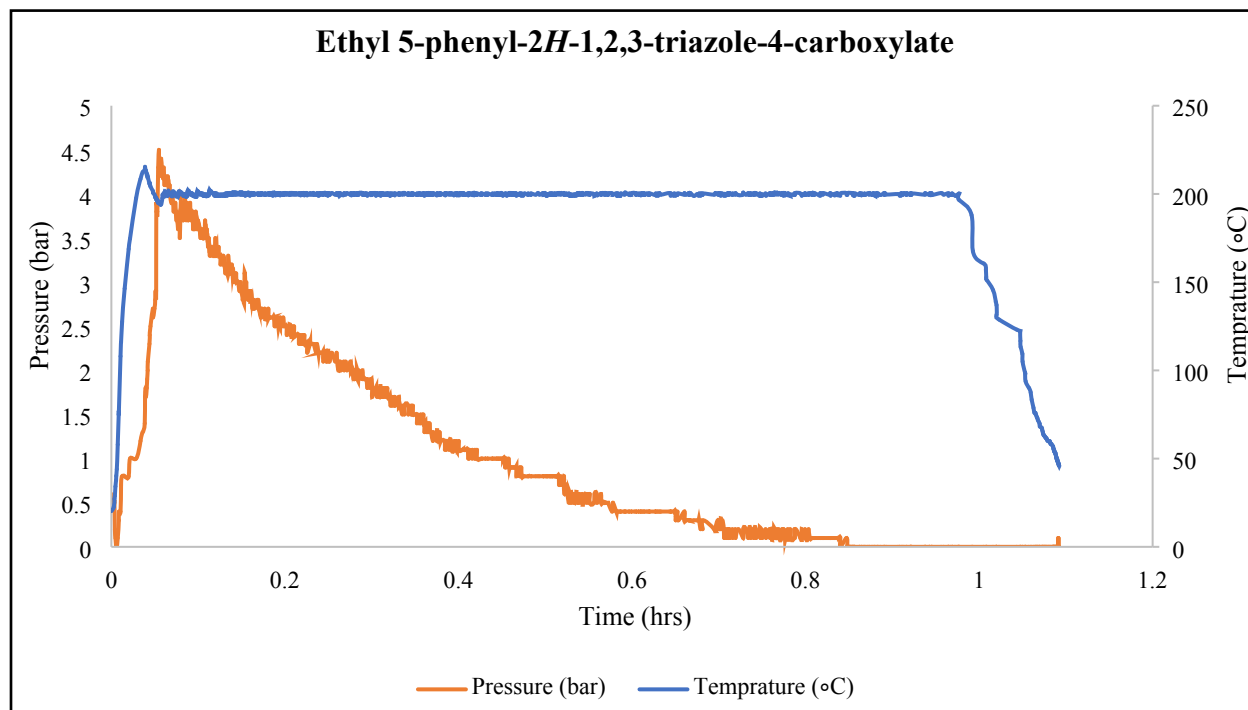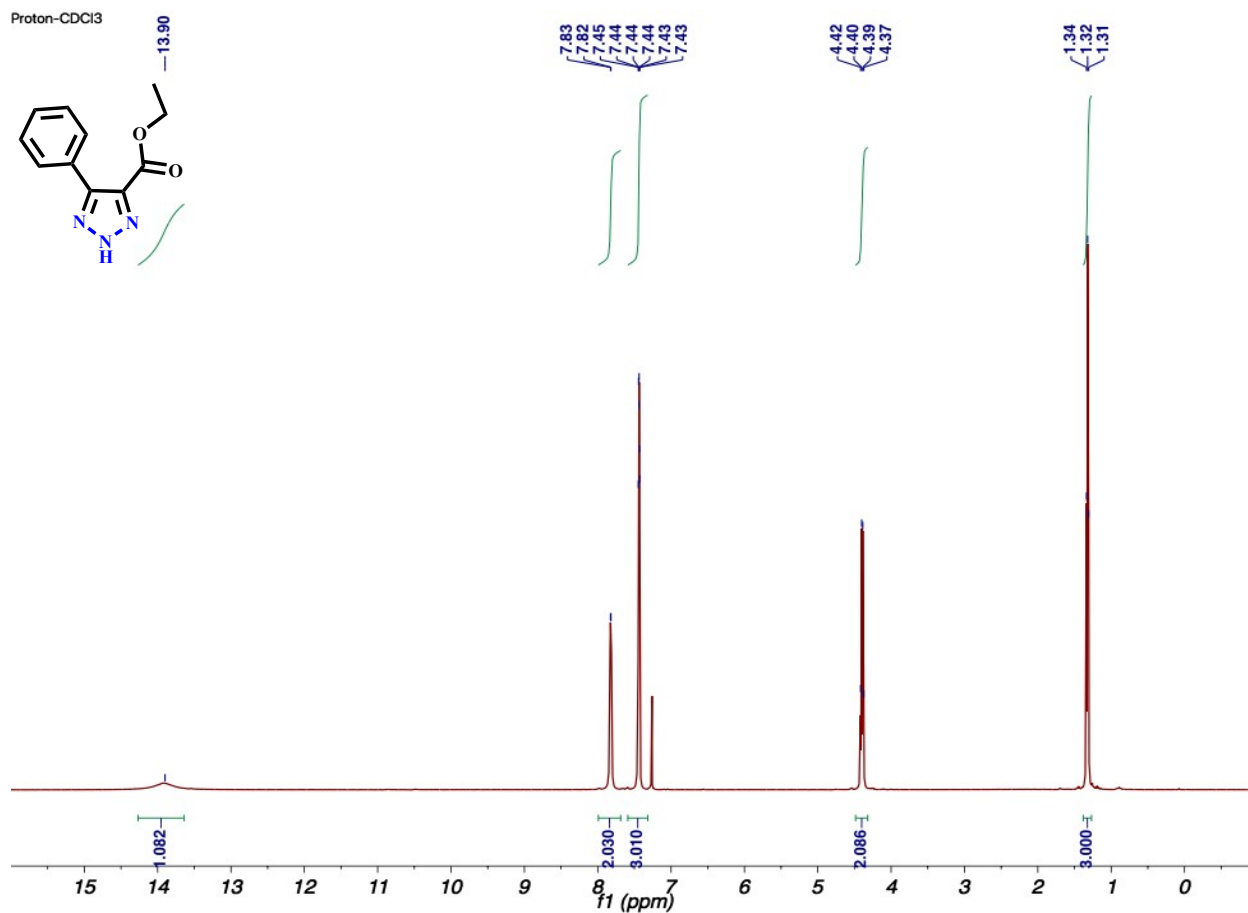

Carbon-CDCl<sub>3</sub>

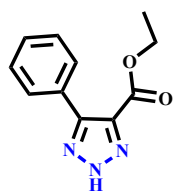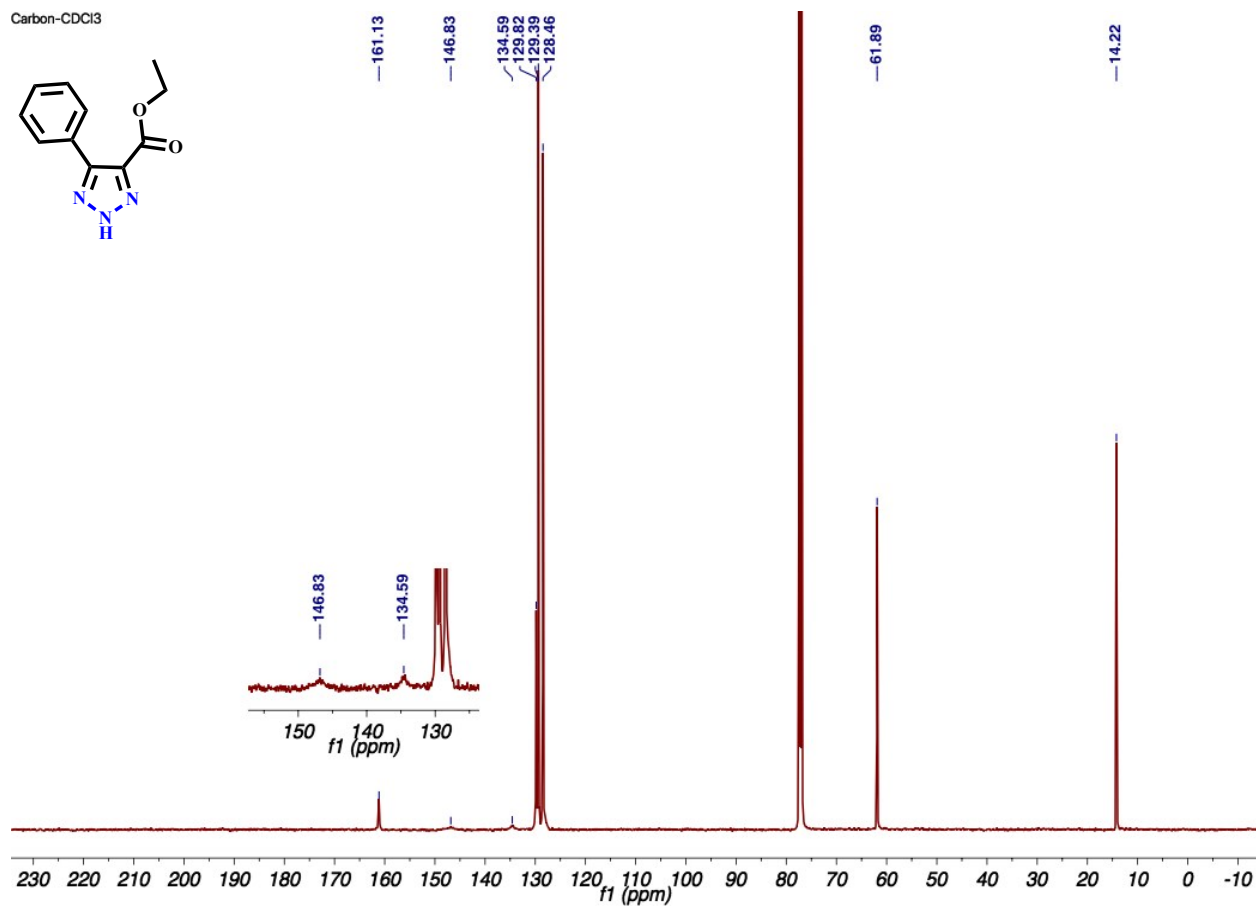

**Microwave data and NMR spectra of 4-(Naphthalen-1-yl)-5-(trimethylsilyl)-2H-1,2,3-triazole (10)**

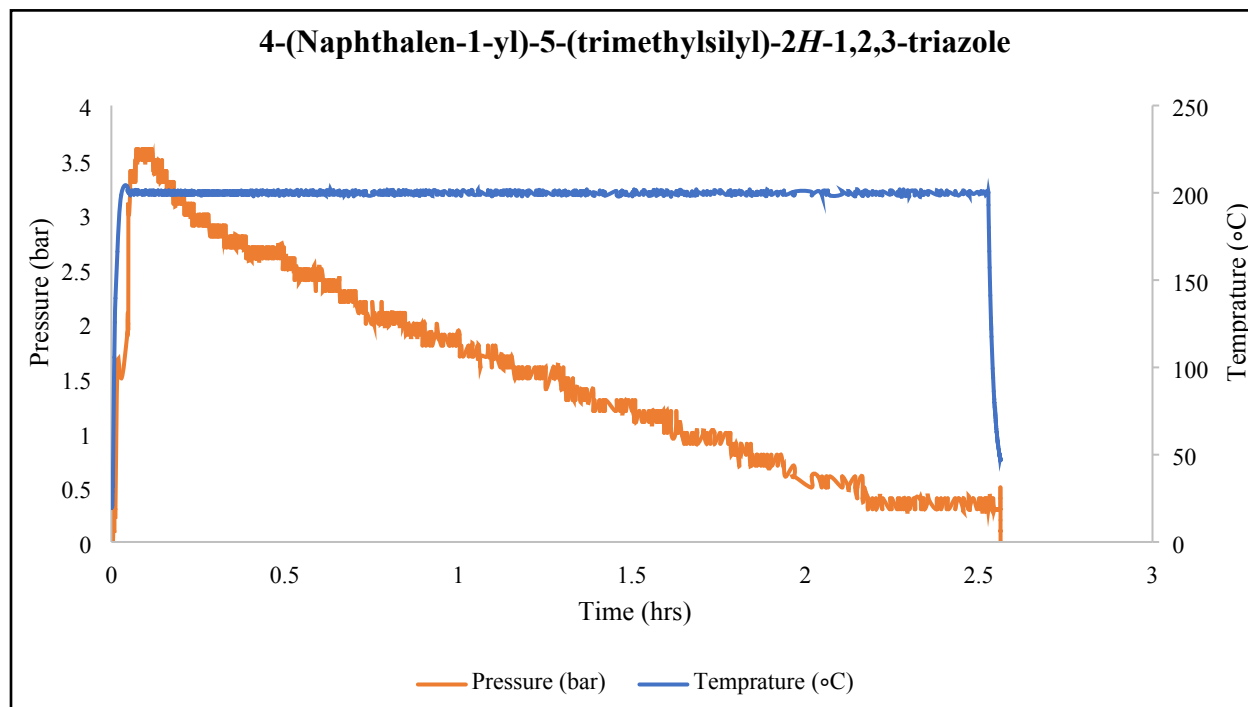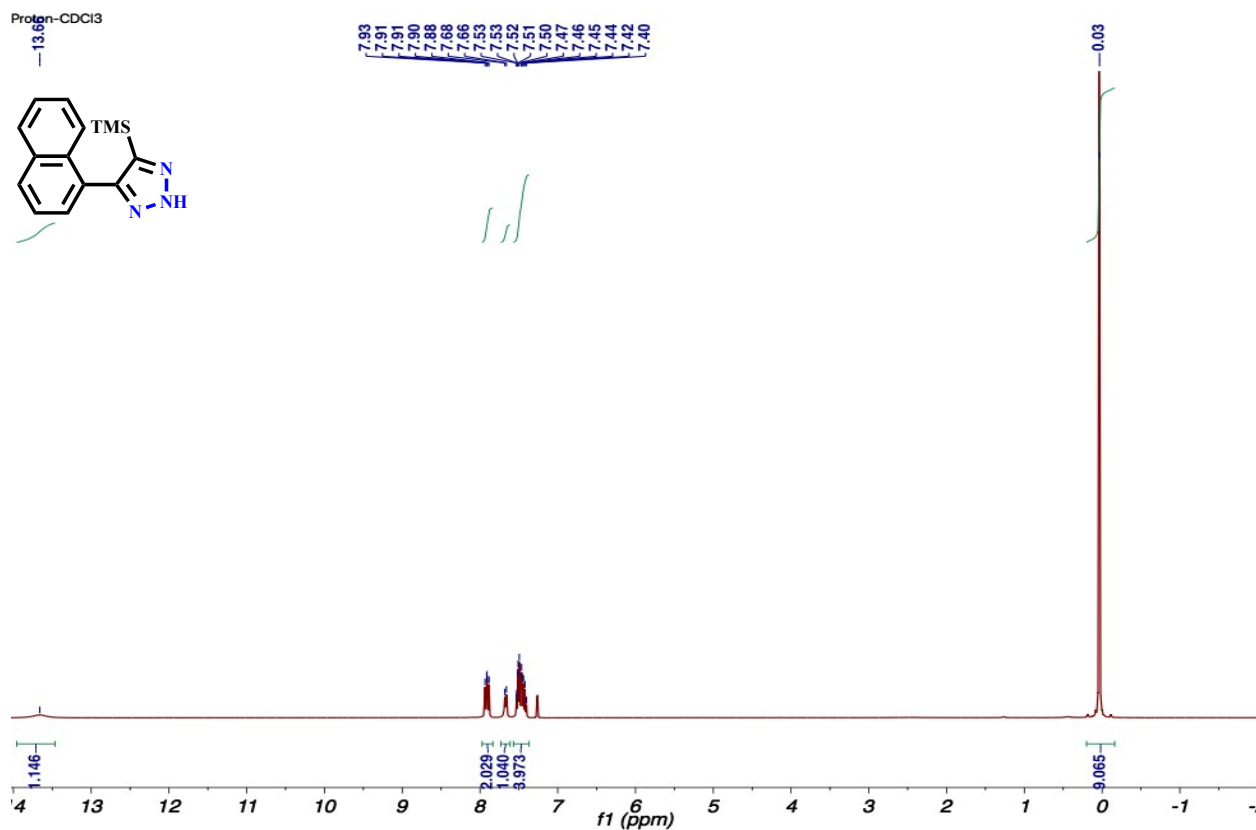

Carbon-CDCl<sub>3</sub>

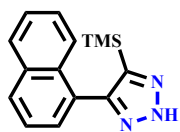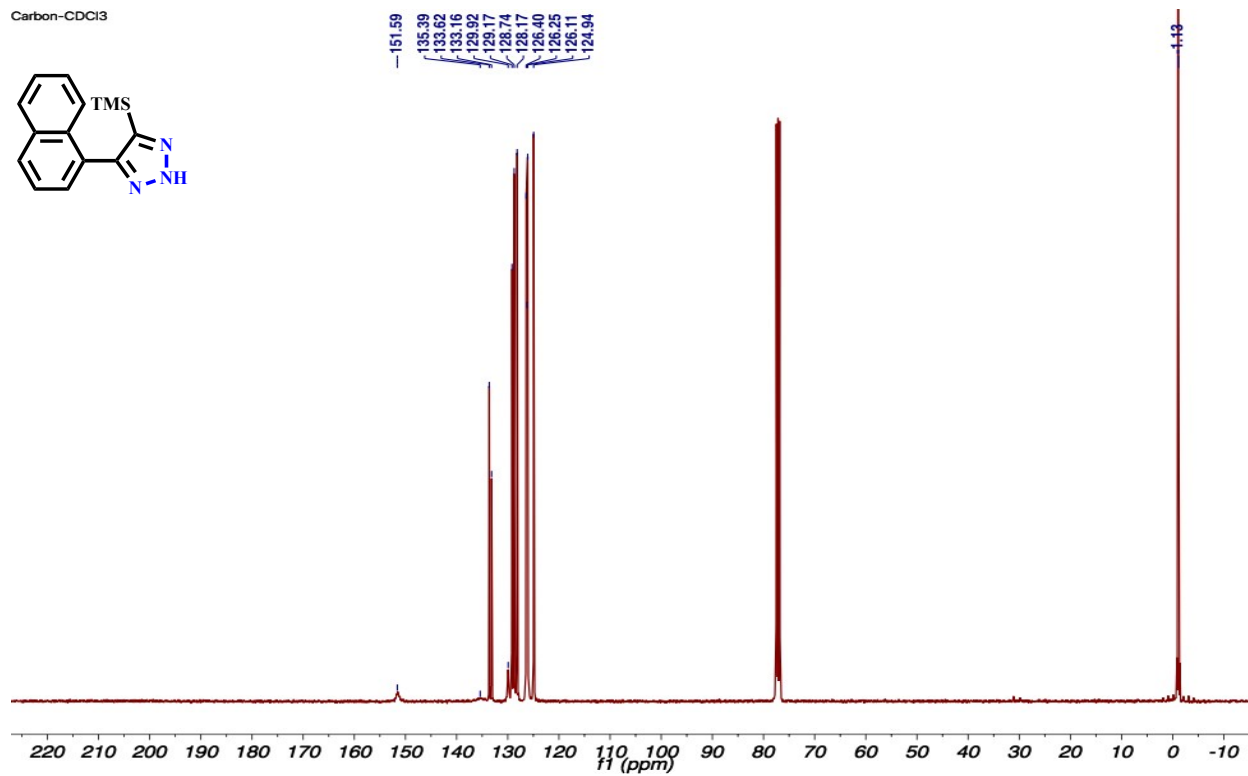

# Microwave data and NMR spectra of 4,5-Diphenyl-2H-1,2,3-triazole (11)

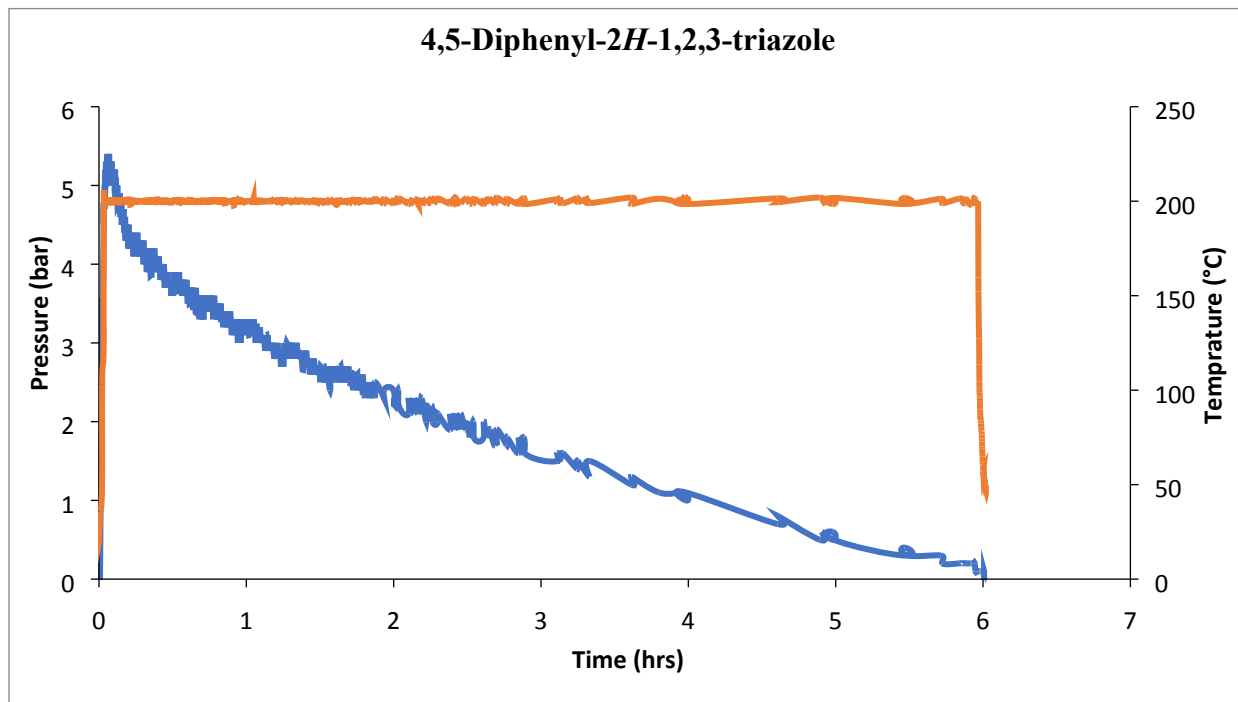

Proton-DMSO-d6

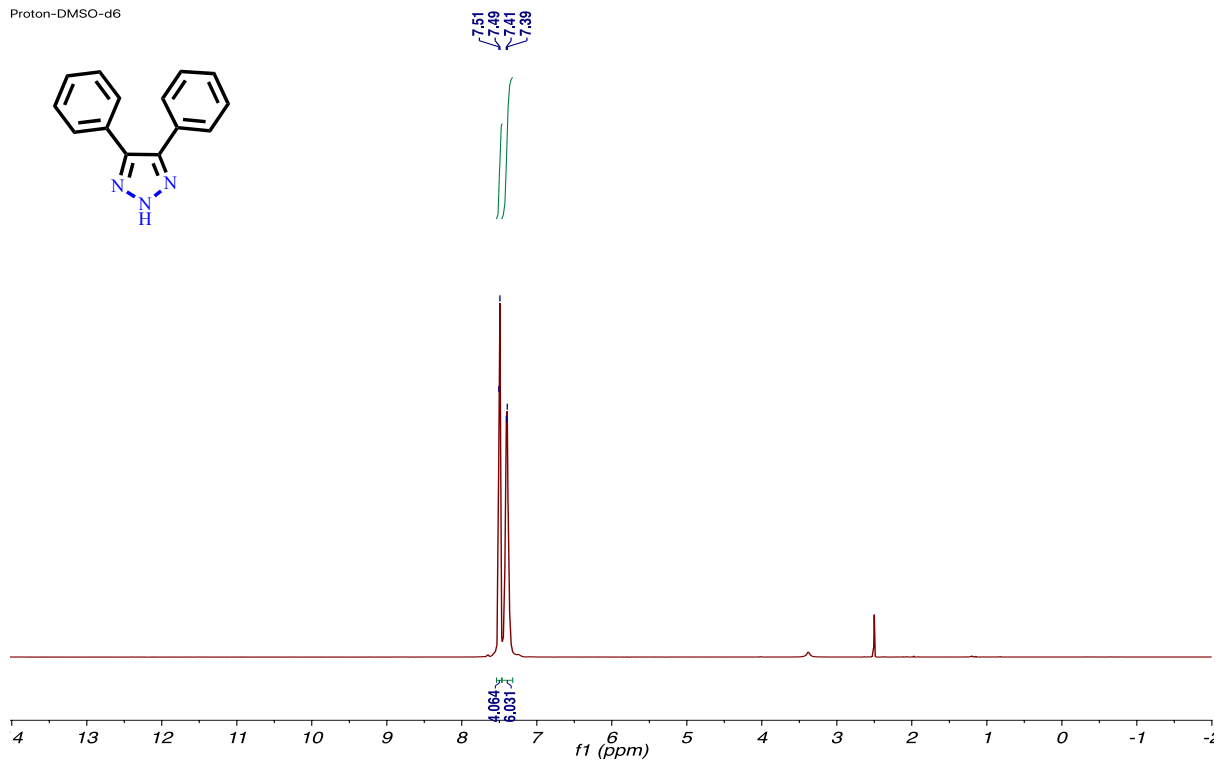

Carbon-DMSO-d6

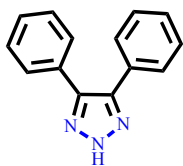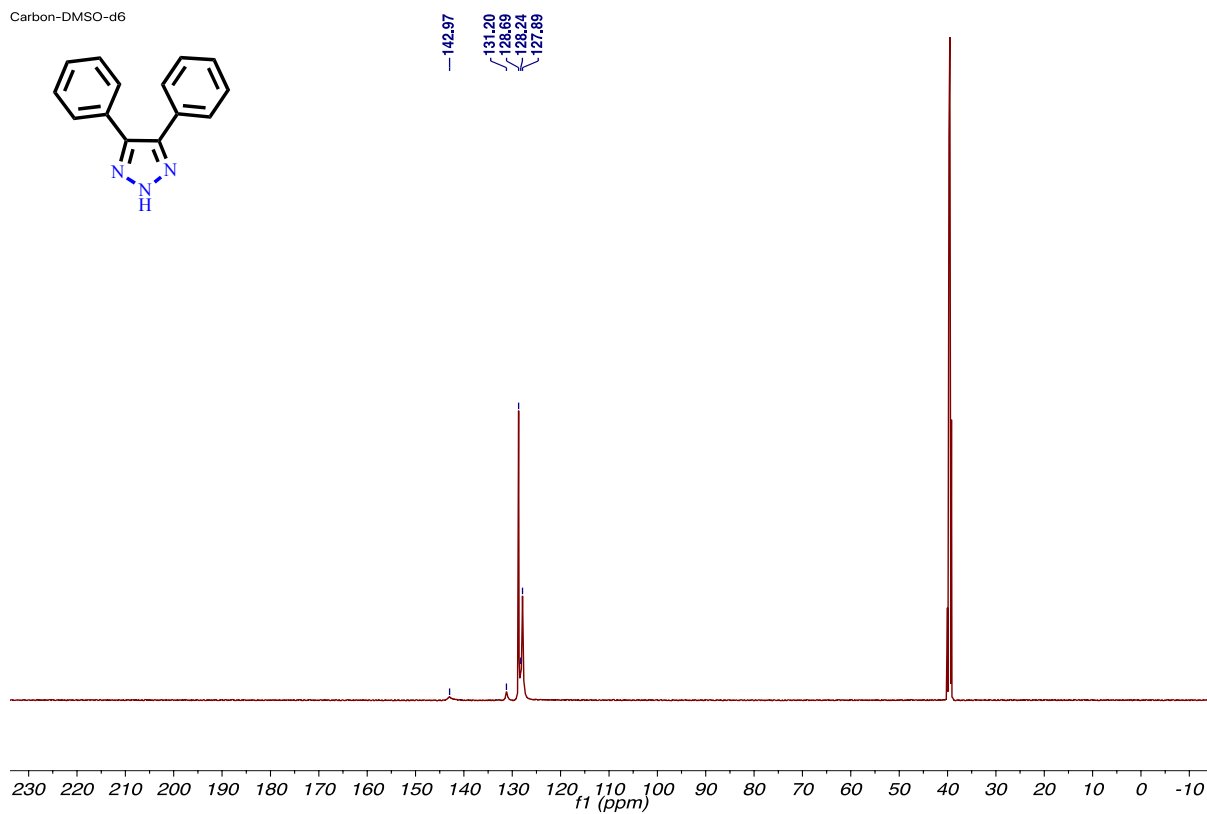

## Microwave data and NMR spectra of Diethyl 2*H*-1,2,3-triazole-4,5-dicarboxylate (12)

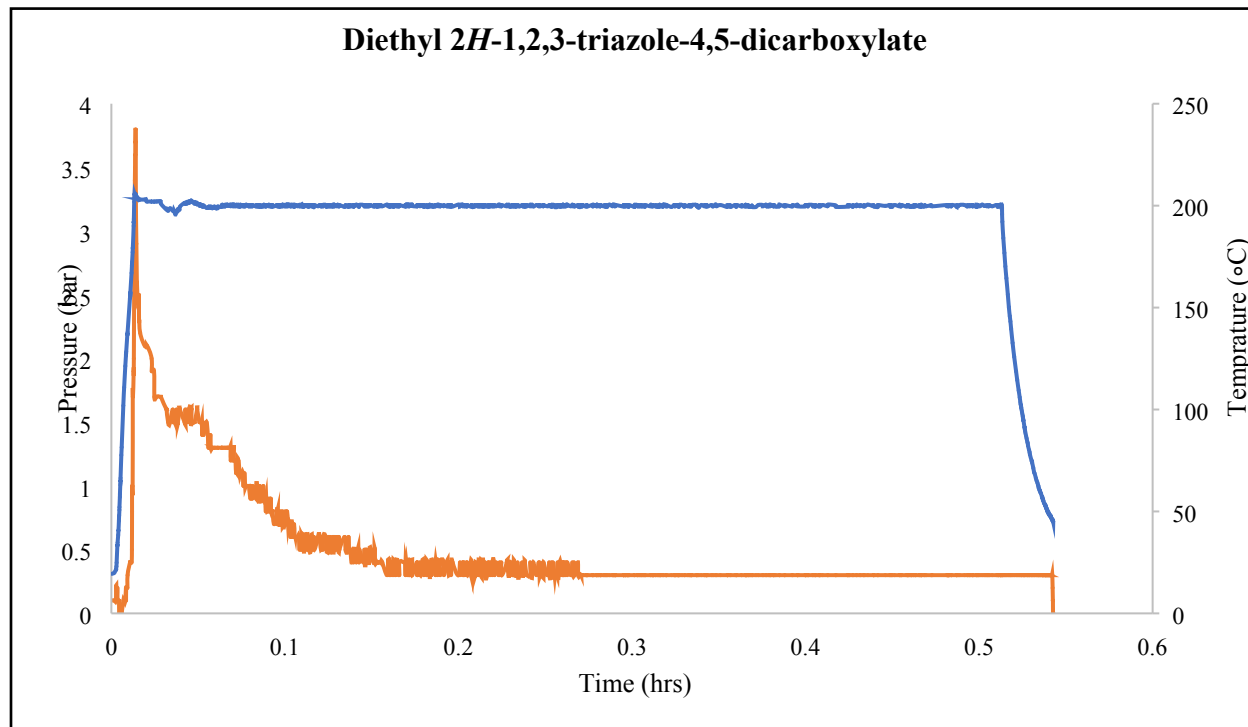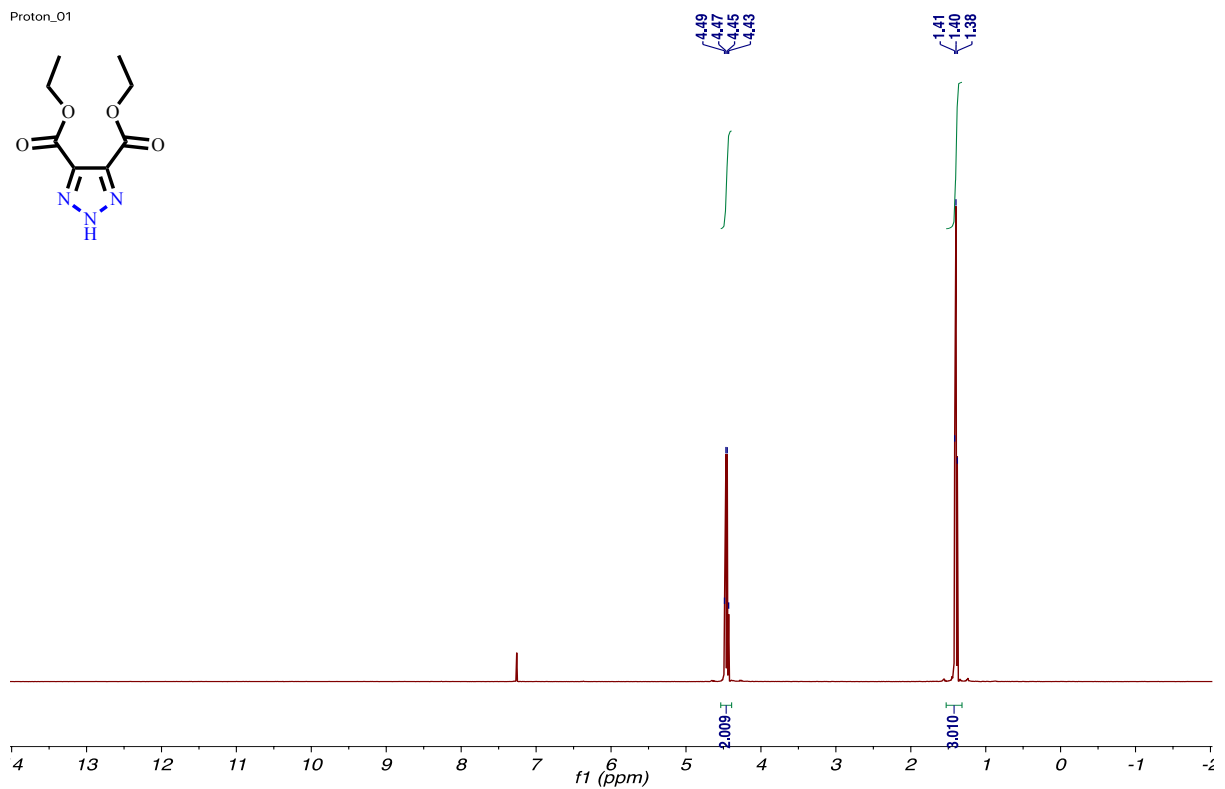

Carbon\_01

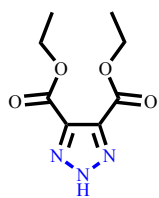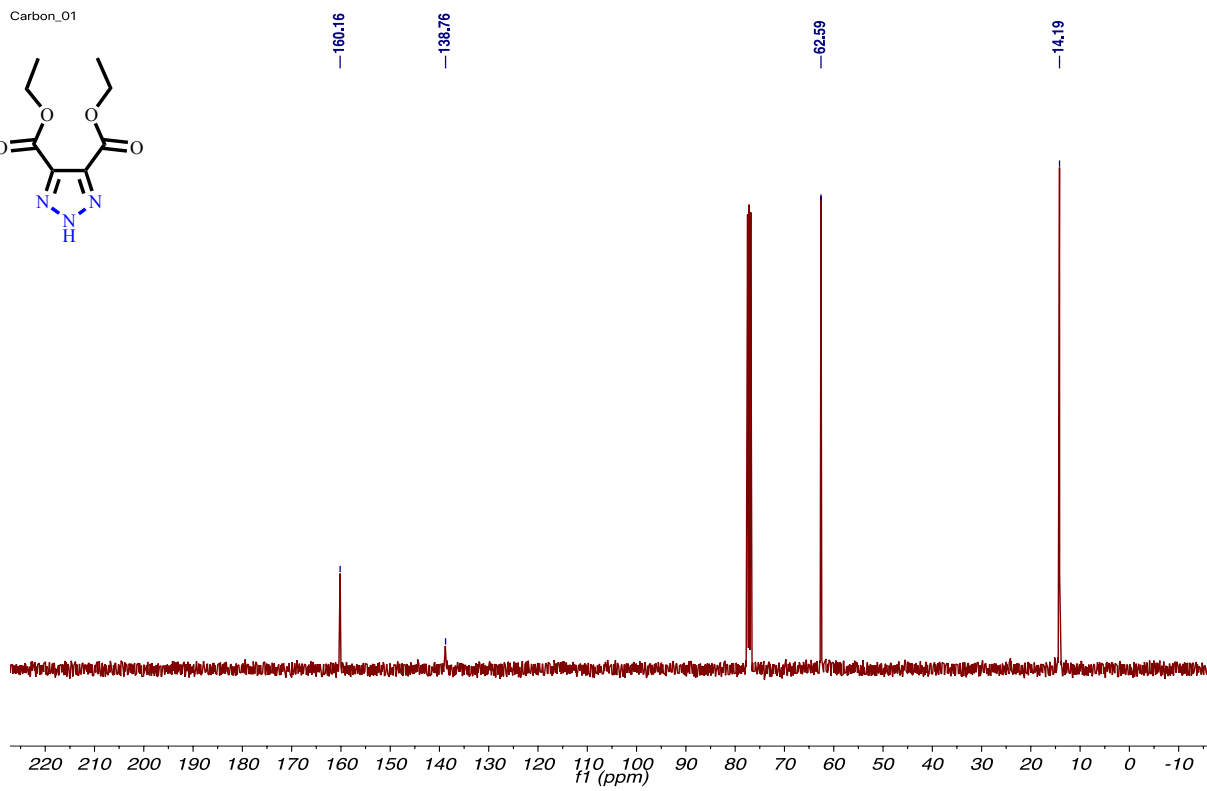



# Microwave data and NMR spectra of 4-Cyclopropyl-5-(trimethylsilyl)-2H-1,2,3-triazole (13)

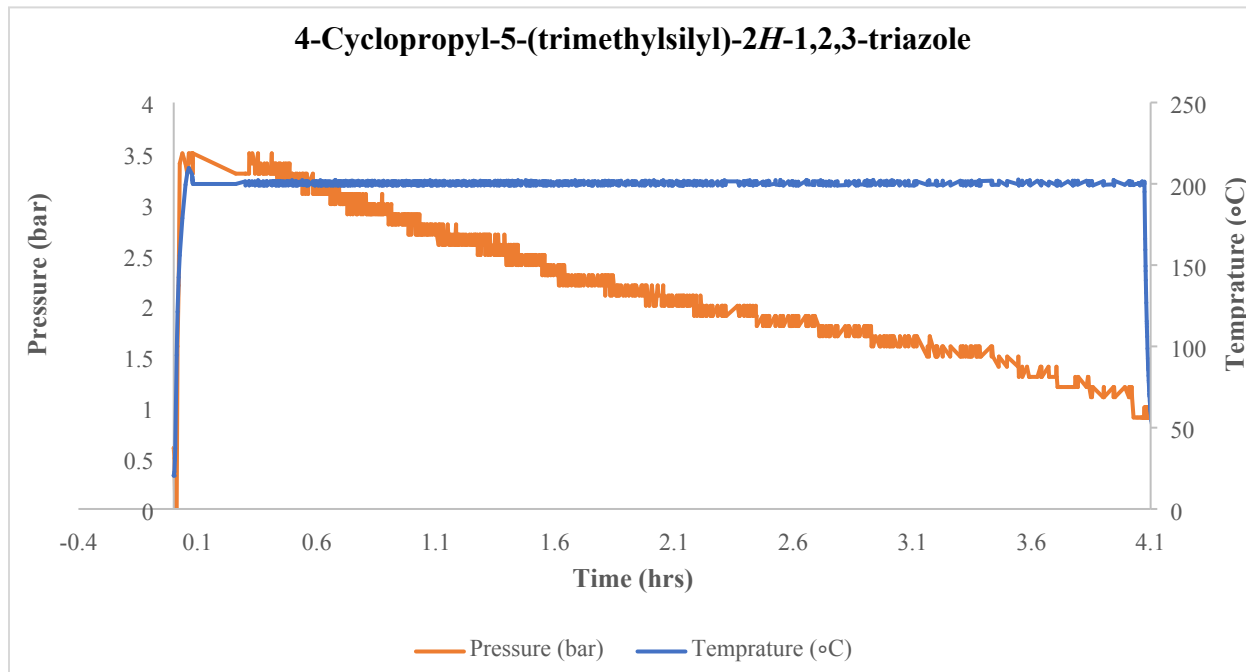

Proton-CDCl<sub>3</sub>

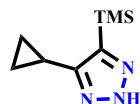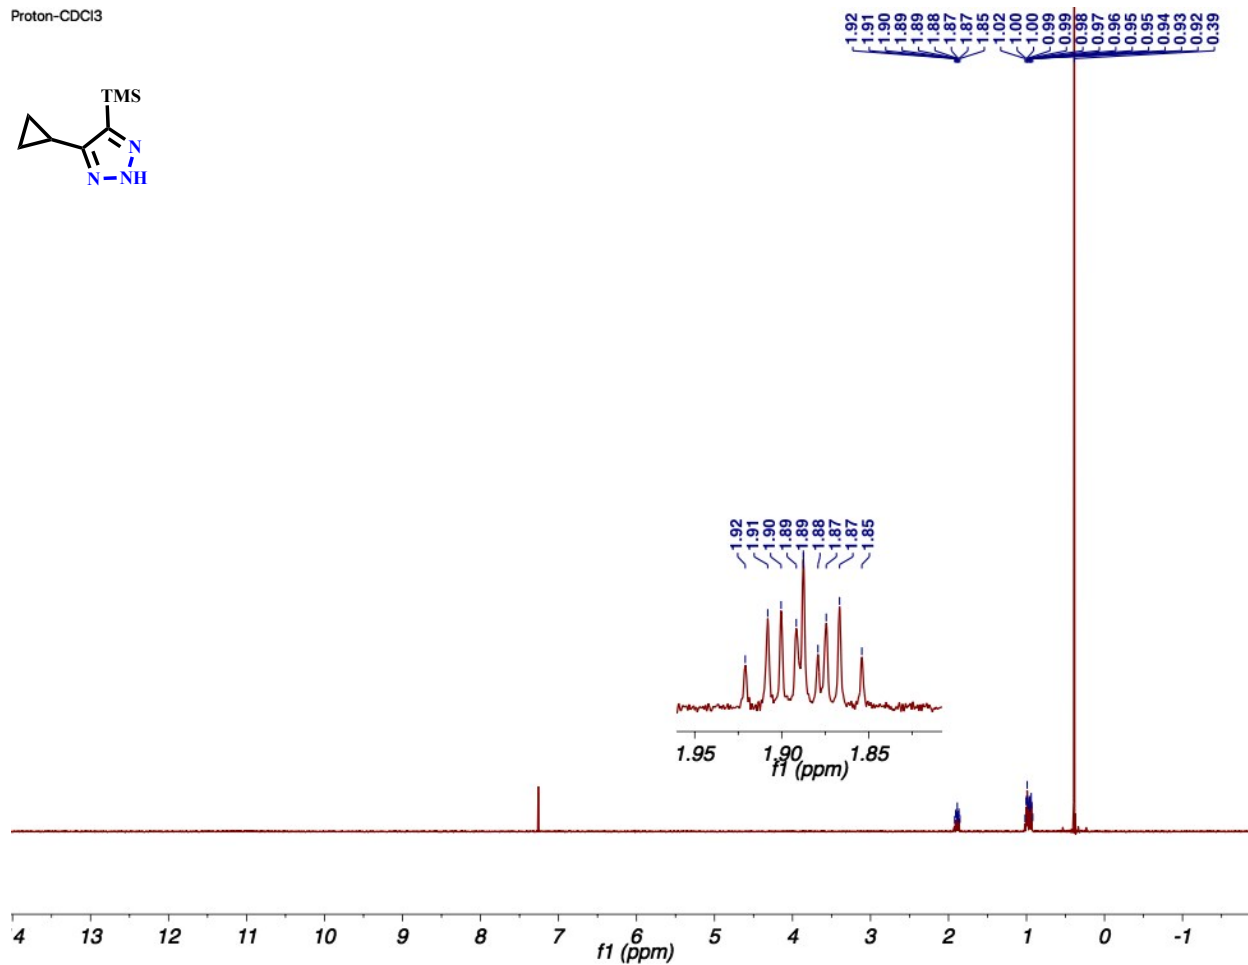

Carbon-CDCl<sub>3</sub>

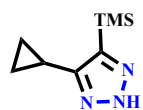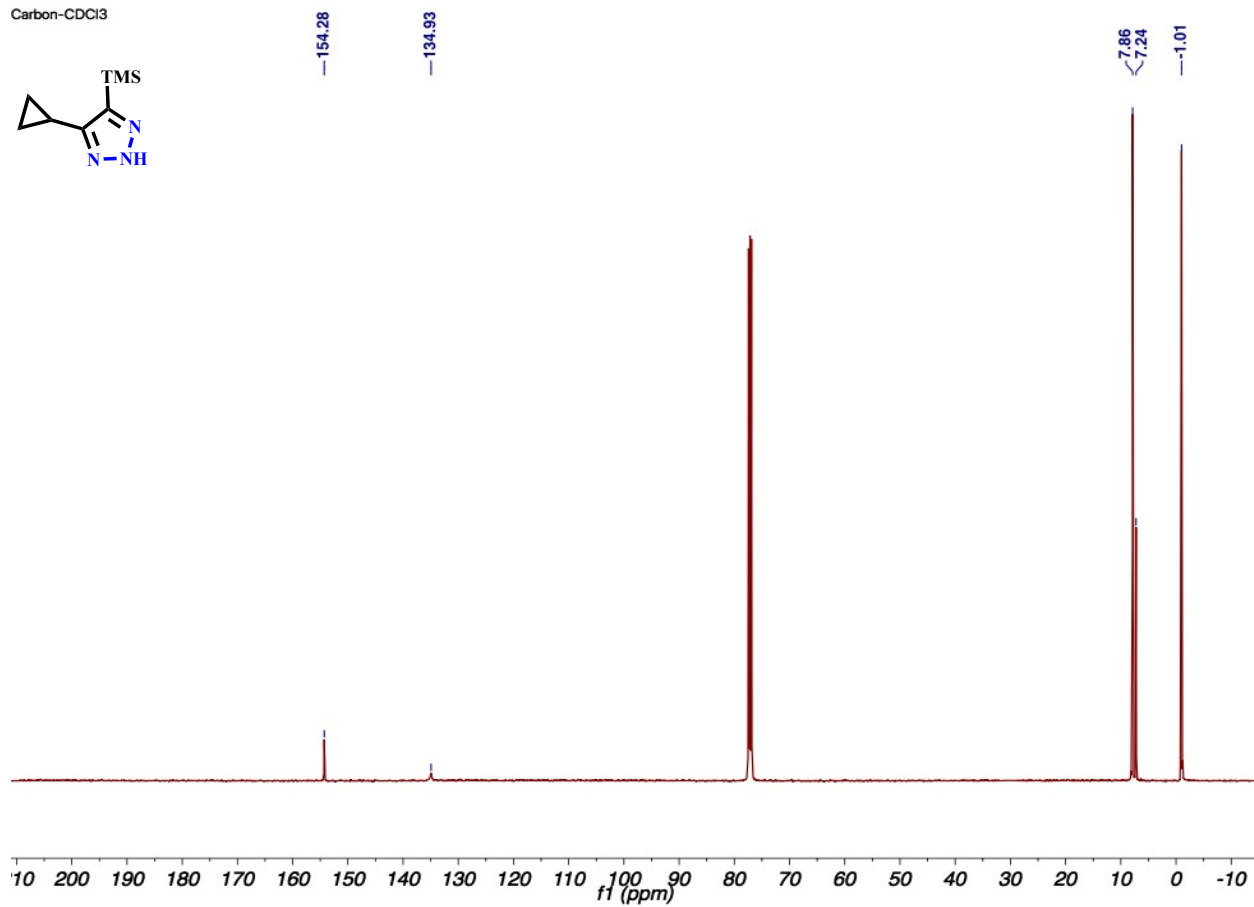

# Microwave data and NMR spectra of 4-Propyl-5-(trimethylsilyl)-2H-1,2,3-triazole (14)

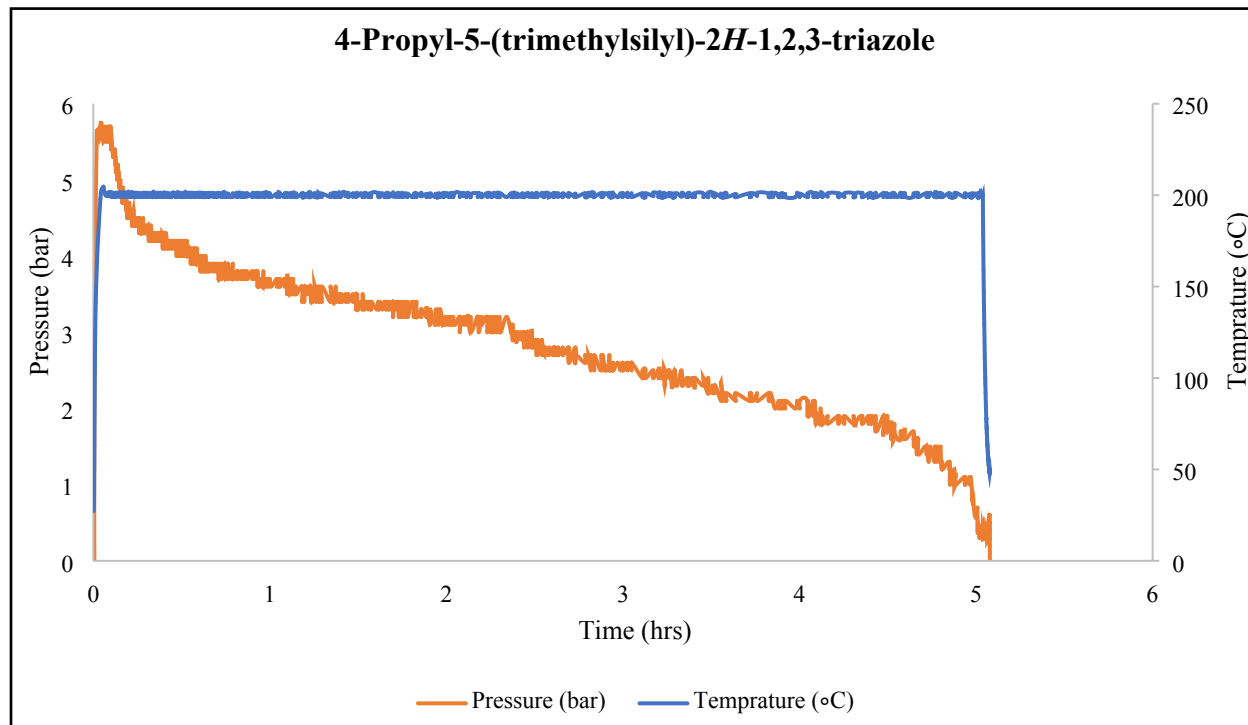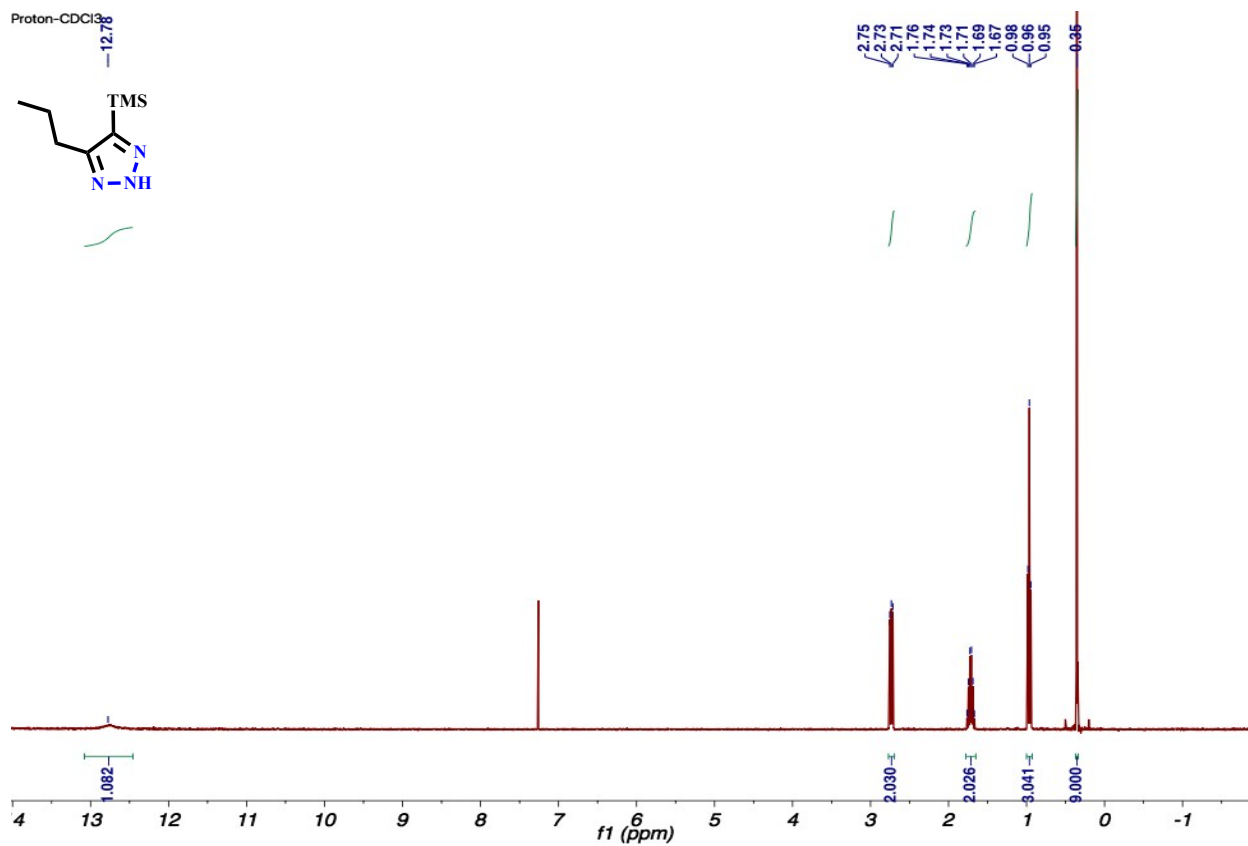

Carbon-CDCl3

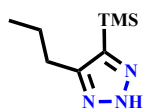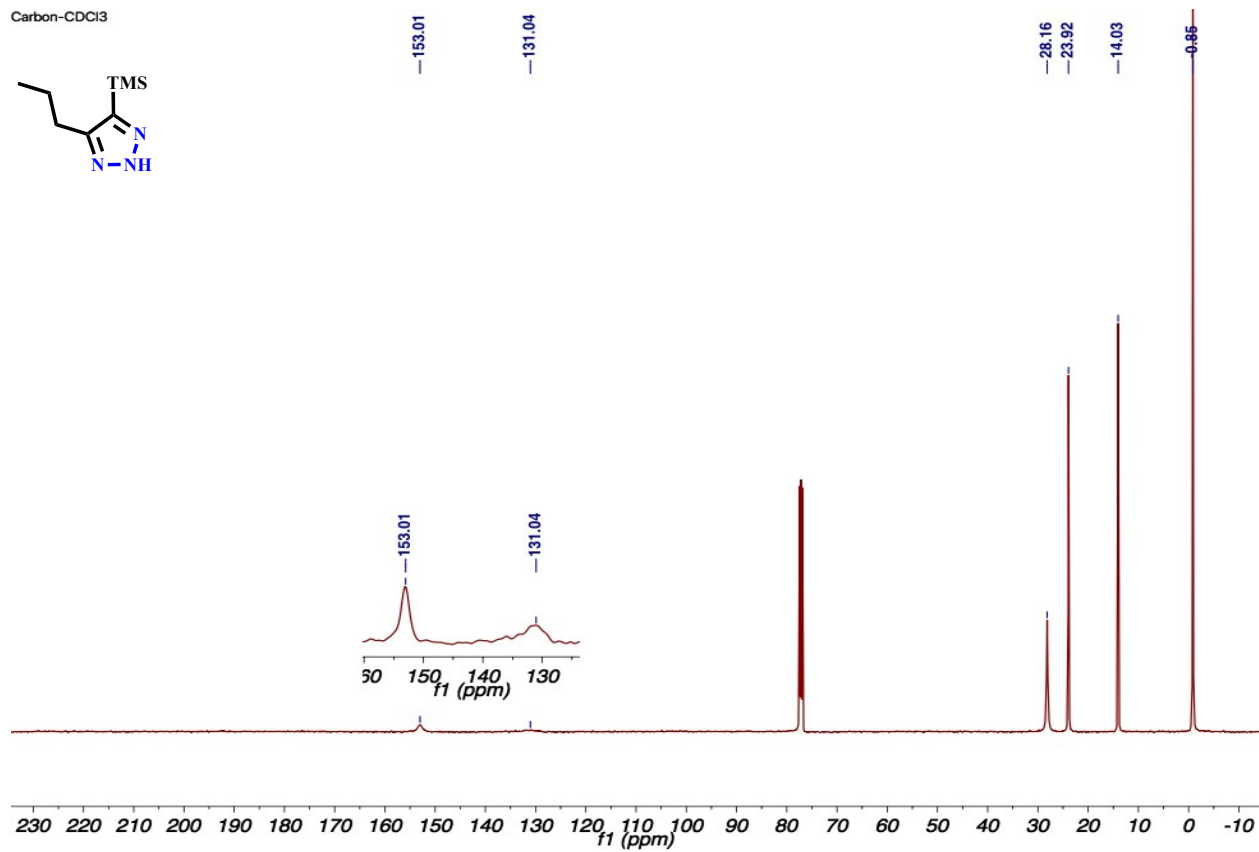

# Microwave data and NMR spectra of 4-Ethyl-5-phenyl-2H-1,2,3-triazole (15)

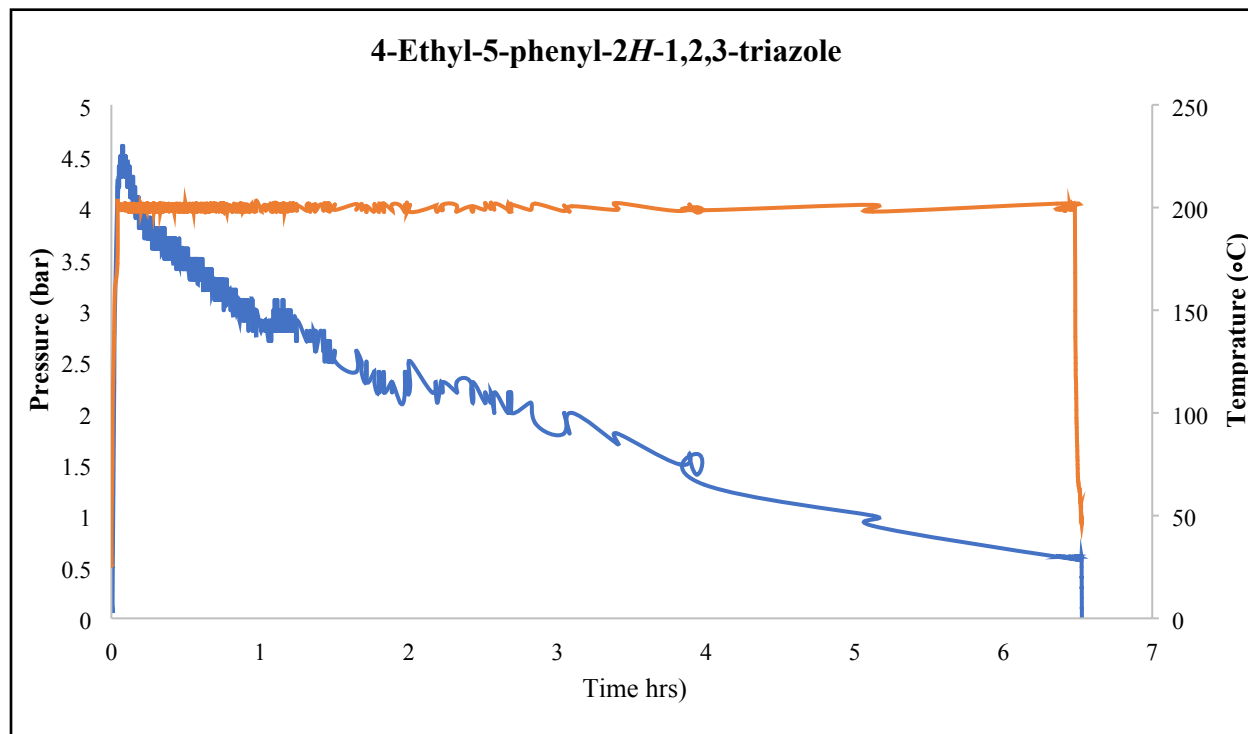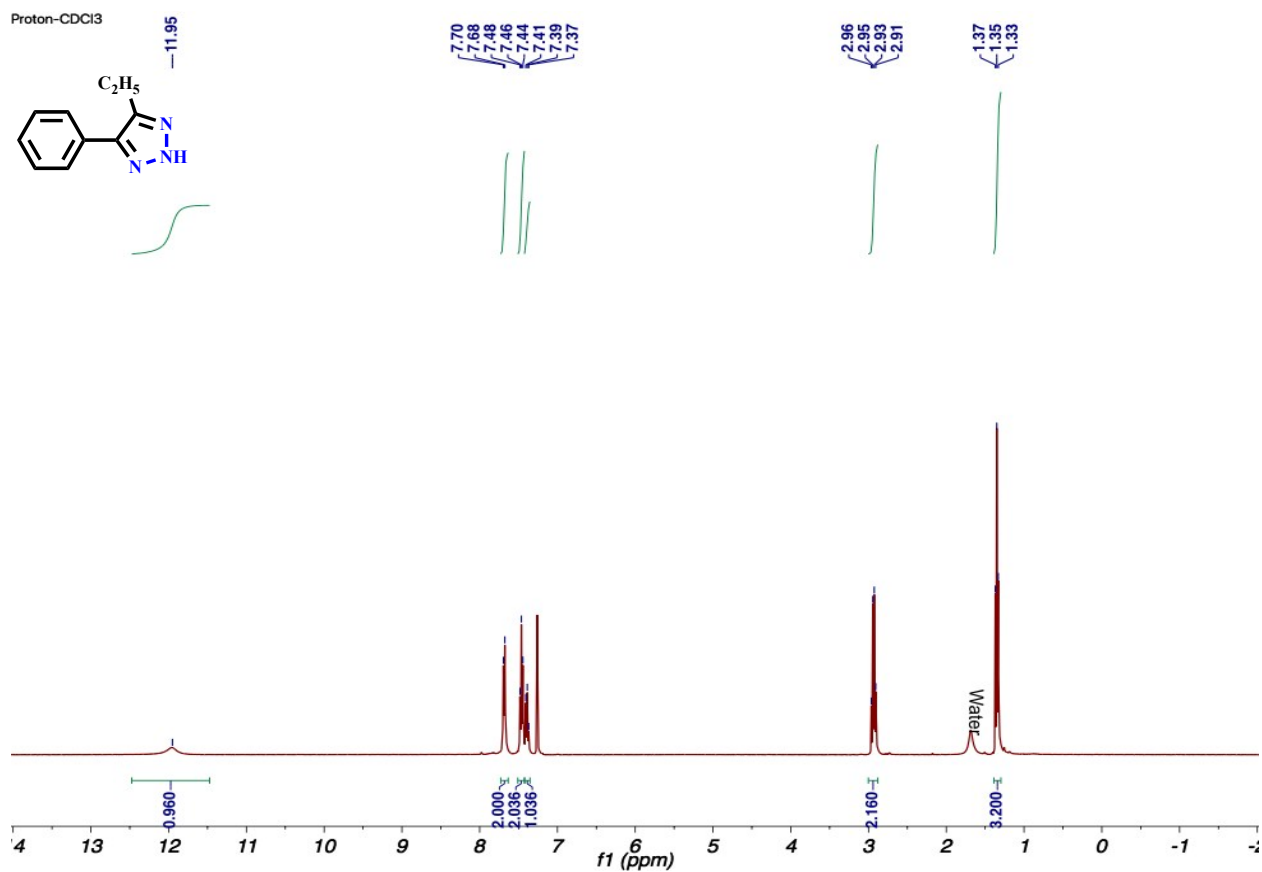

Carbon-CDCl<sub>3</sub>

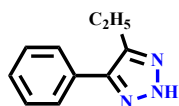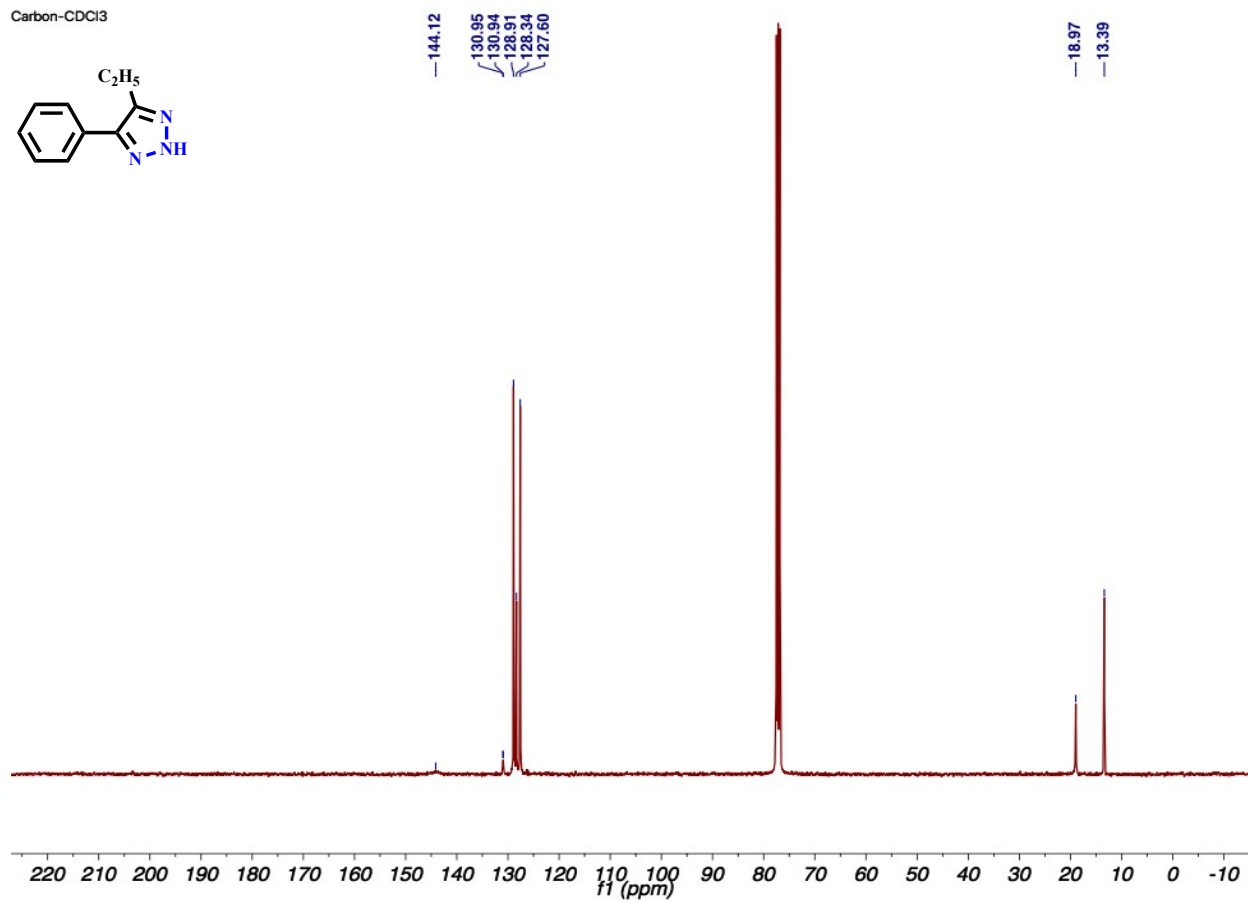

# Microwave data, NMR spectra, and Variant Temperature Study of 4,5-Bis(trimethylsilyl)-1H-1,2,3-triazole (16)

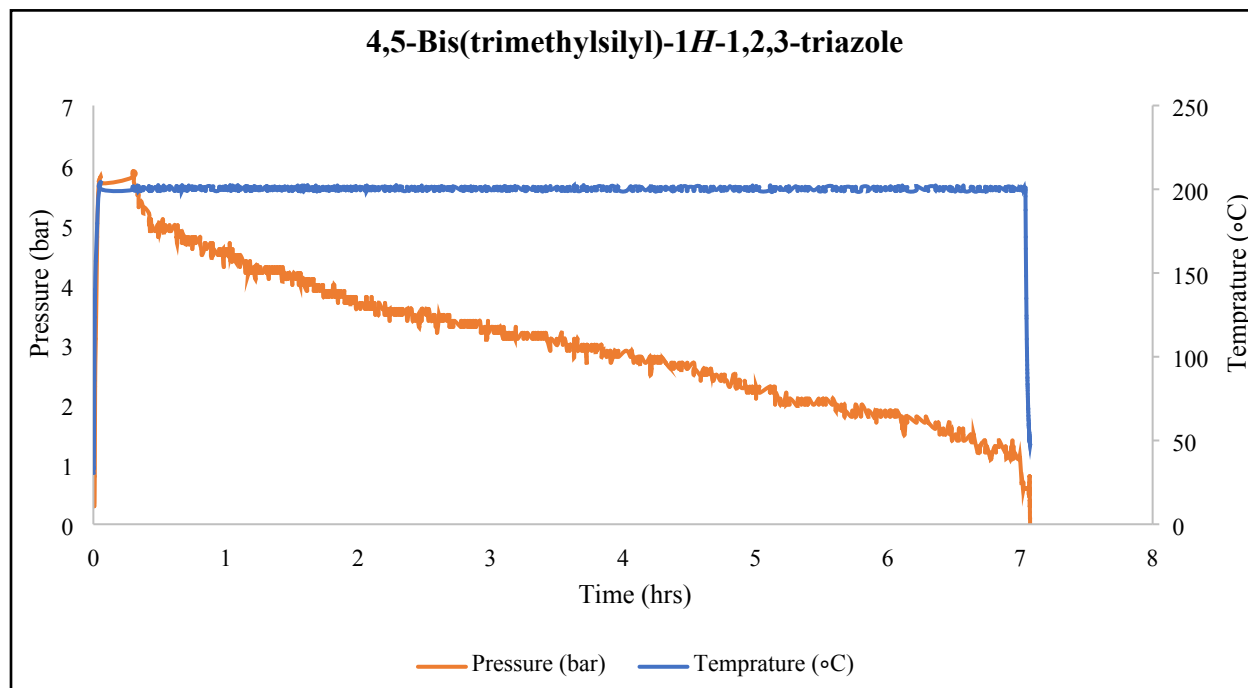

Proton-CDCI3

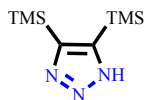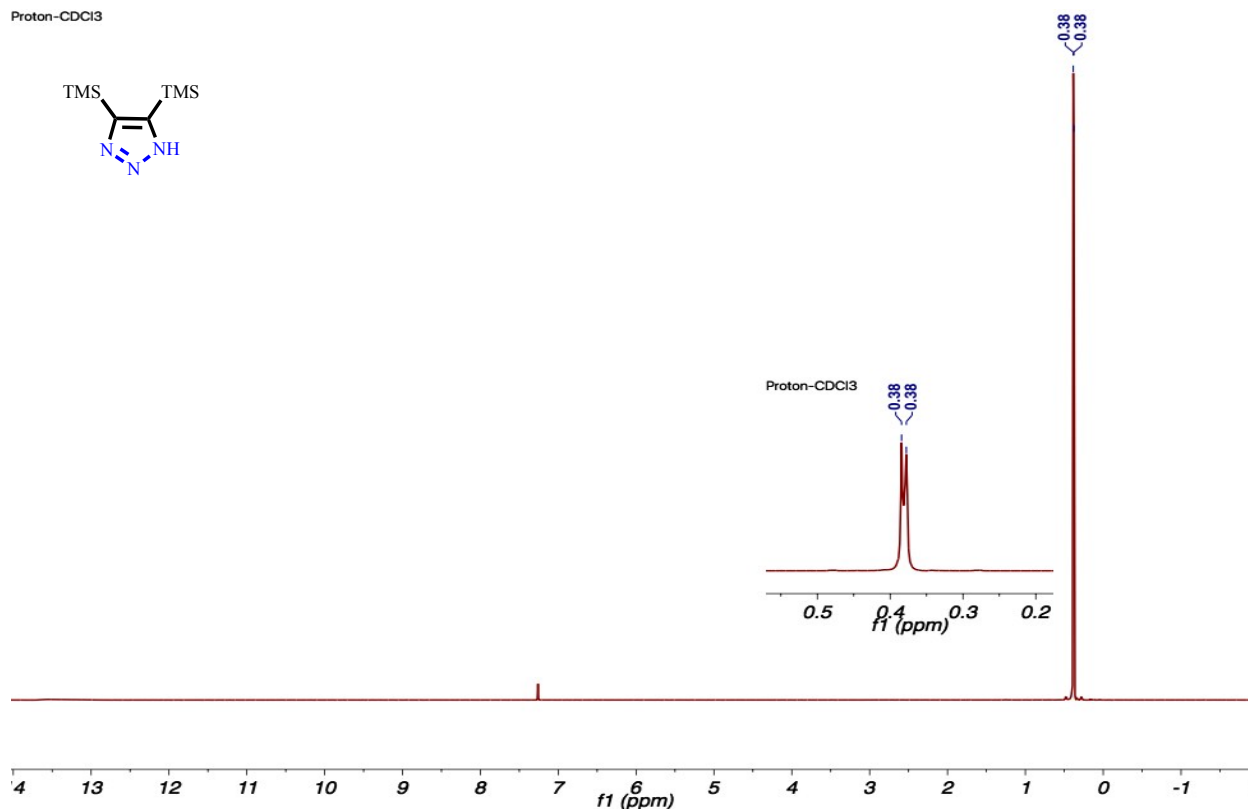

Carbon-CDCl<sub>3</sub>

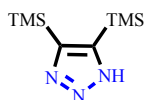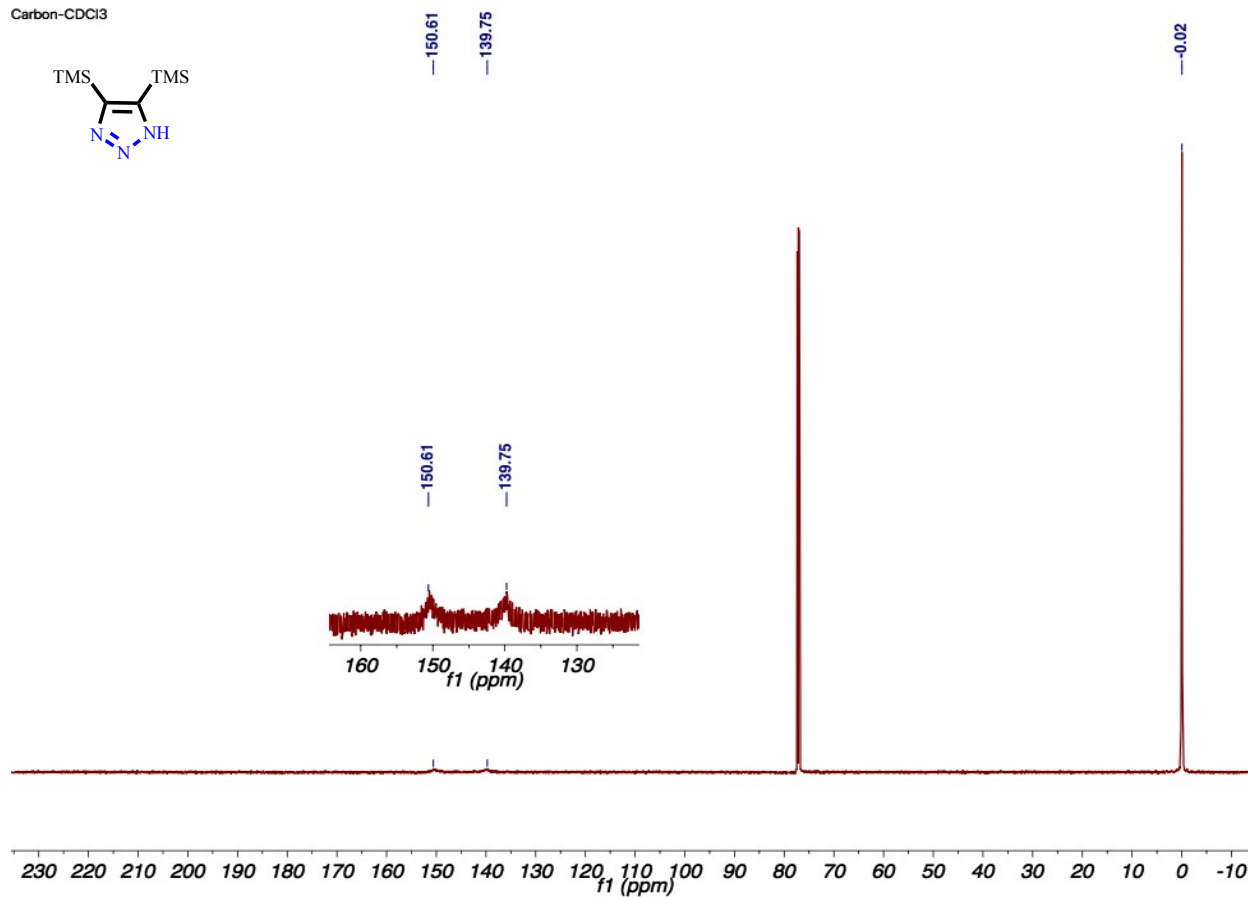

Proton-CDCl<sub>3</sub>

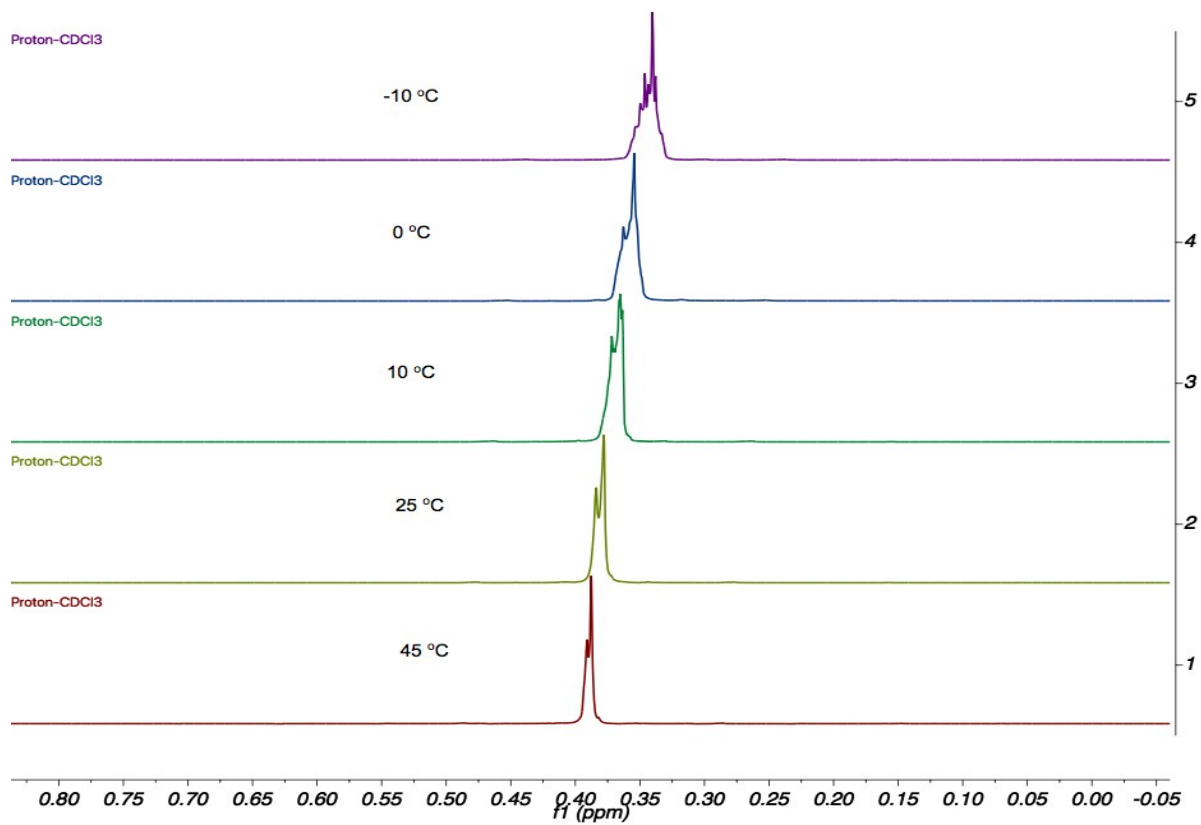



Carbon-CDCl<sub>3</sub>+a drop of TFA

162.41  
162.11  
161.82  
161.52

145.68

119.73  
117.42  
115.11  
112.80

-0.65

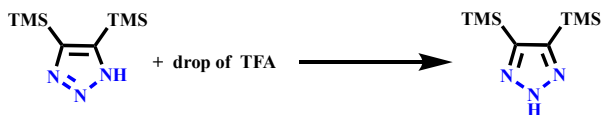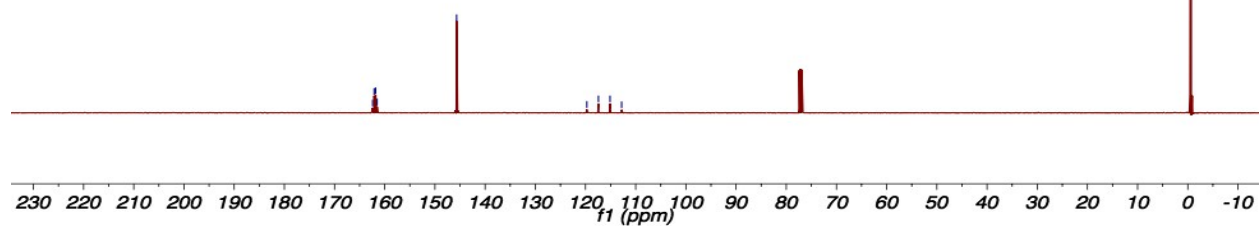

# NMR spectra of 1-methyl-4,5-bis(trimethylsilyl)-1H-1,2,3-triazole (17)

Proton-CDCl<sub>3</sub>- CRUDE SPECTRUM

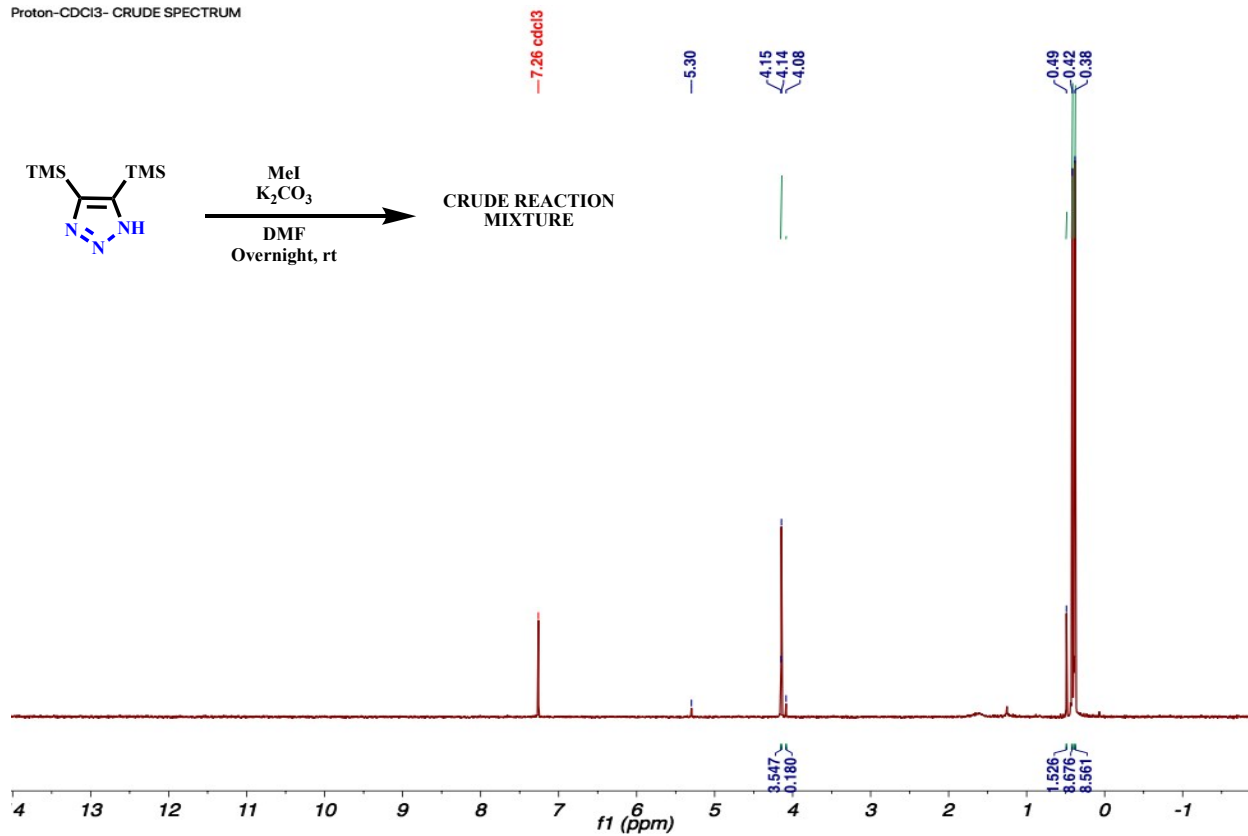

Proton-CDCl<sub>3</sub>

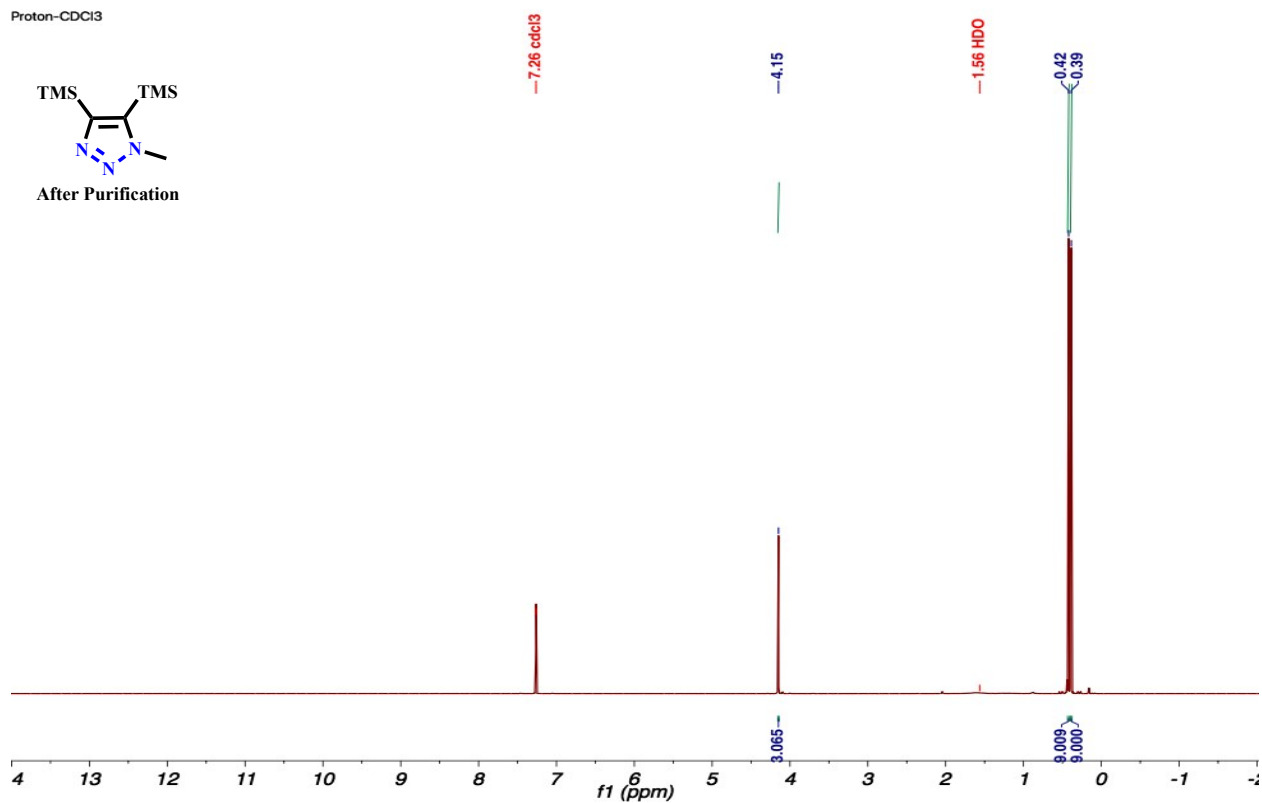

Carbon-CDCl3

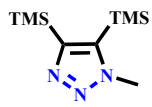

After Purification

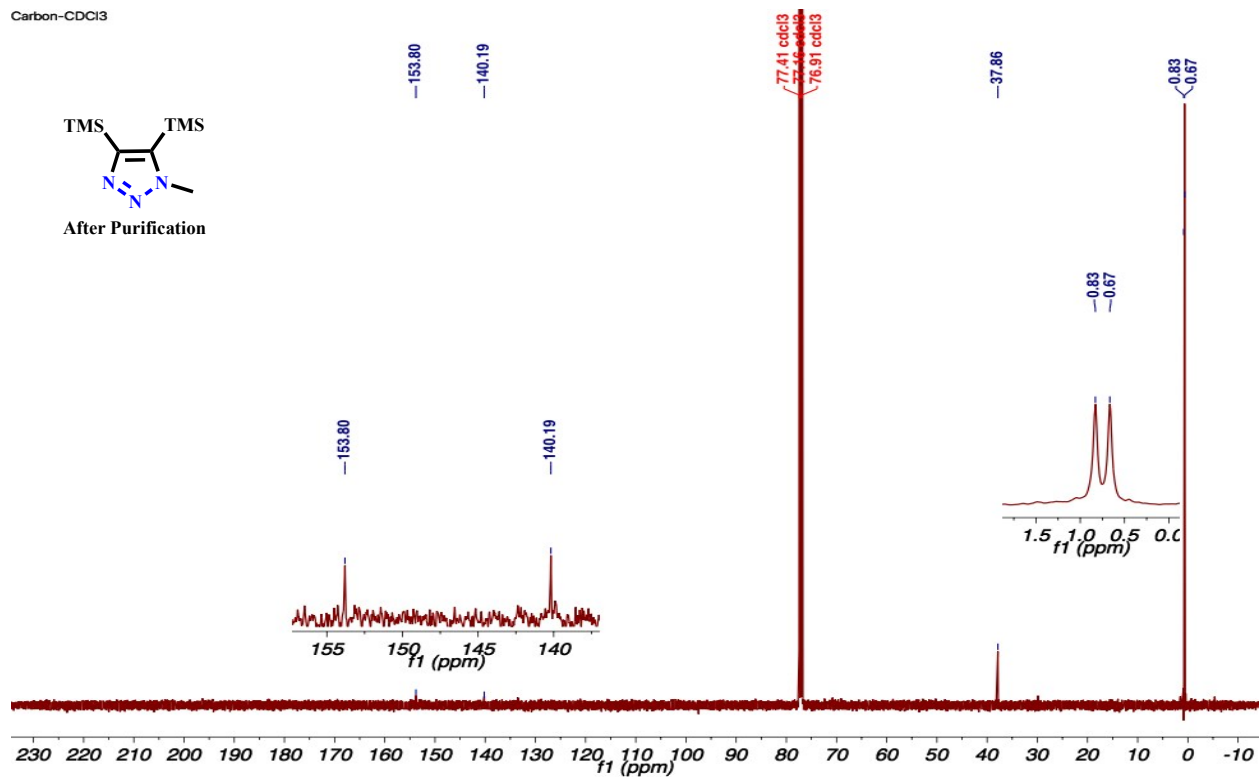

### X-ray Structure Determination for 16:

A prism-like specimen of  $C_8H_{19}N_3Si_2$  was used for the X-ray crystallographic analysis. The X-ray intensity data were measured on a Bruker APEX DUO system equipped with a TRIUMPH curved-crystal monochromator and a MoK $\alpha$  fine-focus tube ( $\lambda = 0.71073 \text{ \AA}$ ).

A total of 2520 frames were collected. The total exposure time was 7.00 hours. The frames were integrated with the Bruker SAINT software package using a SAINT V8.34A (Bruker AXS, 2013) algorithm. The integration of the data using a monoclinic unit cell yielded a total of 24848 reflections to a maximum  $\theta$  angle of  $27.48^\circ$  ( $0.77 \text{ \AA}$  resolution), of which 2950 were independent (average redundancy 8.423, completeness = 99.7%,  $R_{\text{int}} = 4.44\%$ ,  $R_{\text{sig}} = 2.30\%$ ) and 2747 (93.12%) were greater than  $2\sigma(F^2)$ . The final cell constants of  $a = 6.7038(11) \text{ \AA}$ ,  $b = 9.1027(15) \text{ \AA}$ ,  $c = 21.146(3) \text{ \AA}$ ,  $\beta = 91.335(2)^\circ$ , volume =  $1290.0(4) \text{ \AA}^3$ , are based upon the refinement of the XYZ-centroids of 9881 reflections above  $20 \sigma(I)$  with  $4.872^\circ < 2\theta < 61.00^\circ$ . Data were corrected for absorption effects using the multi-scan method (SADABS). The ratio of minimum to maximum apparent transmission was 0.824.

The structure was solved and refined using the Bruker SHELXTL Software Package, using the space group P 1 21/c 1, with  $Z = 4$  for the formula unit,  $C_8H_{19}N_3Si_2$ . The final anisotropic full-matrix least-squares refinement on  $F^2$  with 127 variables converged at  $R_1 = 6.55\%$ , for the observed data and  $wR_2 = 16.65\%$  for all data. The goodness-of-fit was 1.046. The largest peak in the final difference electron density synthesis was  $1.013 \text{ e}^-/\text{\AA}^3$  and the largest hole was  $-0.440 \text{ e}^-/\text{\AA}^3$  with an RMS deviation of  $0.098 \text{ e}^-/\text{\AA}^3$ . On the basis of the final model, the calculated density was  $1.099 \text{ g/cm}^3$  and  $F(000)$ , 464  $e^-$ .

**Table S1. Sample and crystal data for compound 16**

|                        |                              |                           |
|------------------------|------------------------------|---------------------------|
| Chemical formula       | $C_8H_{19}N_3Si_2$           |                           |
| Formula weight         | 213.44 g/mol                 |                           |
| Temperature            | 100(2) K                     |                           |
| Wavelength             | 0.71073 $\text{\AA}$         |                           |
| Crystal system         | monoclinic                   |                           |
| Space group            | P 1 21/c 1                   |                           |
| Unit cell dimensions   | $a = 6.7038(11) \text{ \AA}$ | $\alpha = 90^\circ$       |
|                        | $b = 9.1027(15) \text{ \AA}$ | $\beta = 91.335(2)^\circ$ |
|                        | $c = 21.146(3) \text{ \AA}$  | $\gamma = 90^\circ$       |
| Volume                 | $1290.0(4) \text{ \AA}^3$    |                           |
| Z                      | 4                            |                           |
| Density (calculated)   | $1.099 \text{ g/cm}^3$       |                           |
| Absorption coefficient | $0.243 \text{ mm}^{-1}$      |                           |
| F(000)                 | 464                          |                           |

**Table S2. Data collection and structure refinement for compound 16**

|                                     |                                                                                                 |
|-------------------------------------|-------------------------------------------------------------------------------------------------|
| Diffractometer                      | Bruker APEX DUO                                                                                 |
| Radiation source                    | fine-focus tube, MoK $\alpha$                                                                   |
| Theta range for data collection     | 1.93 to 27.48 $^\circ$                                                                          |
| Index ranges                        | -8 $\leq$ h $\leq$ 8, -11 $\leq$ k $\leq$ 11, -27 $\leq$ l $\leq$ 27                            |
| Reflections collected               | 24848                                                                                           |
| Independent reflections             | 2950 [R(int) = 0.0444]                                                                          |
| Coverage of independent reflections | 99.7%                                                                                           |
| Absorption correction               | multi-scan                                                                                      |
| Structure solution technique        | direct methods                                                                                  |
| Structure solution program          | SHELXTL XT 2014/4 (Bruker AXS, 2014)                                                            |
| Refinement method                   | Full-matrix least-squares on F $^2$                                                             |
| Refinement program                  | SHELXTL XL 2014/7 (Bruker AXS, 2014)                                                            |
| Function minimized                  | $\Sigma w(F_o^2 - F_c^2)^2$                                                                     |
| Data / restraints / parameters      | 2950 / 0 / 127                                                                                  |
| Goodness-of-fit on F $^2$           | 1.046                                                                                           |
| Final R indices                     | 2747 data; I $>$ 2 $\sigma$ (I) R1 = 0.0655, wR2 = 0.1652<br>all data R1 = 0.0685, wR2 = 0.1665 |
| Weighting scheme                    | w=1/[ $\sigma^2(F_o^2)+(0.0196P)^2+8.9477P$ ]<br>where P=(F $_o^2$ +2F $_c^2$ )/3               |
| Largest diff. peak and hole         | 1.013 and -0.440 e $\text{\AA}^{-3}$                                                            |
| R.M.S. deviation from mean          | 0.098 e $\text{\AA}^{-3}$                                                                       |

**Table S3. Bond lengths ( $\text{\AA}$ ) for compound 16**

|        |          |        |          |        |          |        |          |
|--------|----------|--------|----------|--------|----------|--------|----------|
| C1-N3  | 1.363(4) | C5-H5C | 0.98     | C1-C2  | 1.398(5) | C6-Si2 | 1.869(4) |
| C1-Si1 | 1.897(3) | C6-H6A | 0.98     | C2-N1  | 1.385(4) | C6-H6B | 0.98     |
| C2-Si2 | 1.880(3) | C6-H6C | 0.98     | C3-Si1 | 1.864(4) | C7-Si2 | 1.864(4) |
| C3-H3A | 0.98     | C7-H7A | 0.98     | C3-H3B | 0.98     | C7-H7B | 0.98     |
| C3-H3C | 0.98     | C7-H7C | 0.98     | C4-Si1 | 1.870(4) | C8-Si2 | 1.873(4) |
| C4-H4A | 0.98     | C8-H8A | 0.98     | C4-H4B | 0.98     | C8-H8B | 0.98     |
| C4-H4C | 0.98     | C8-H8C | 0.98     | C5-Si1 | 1.870(4) | N1-N2  | 1.321(4) |
| C5-H5A | 0.98     | N2-N3  | 1.339(4) | C5-H5B | 0.98     | N3-H1  | 0.86(5)  |

**Table S4. Bond angles ( $^\circ$ ) for compound 16**

|            |          |            |          |
|------------|----------|------------|----------|
| N3-C1-C2   | 103.7(3) | N3-C1-Si1  | 121.5(3) |
| C2-C1-Si1  | 134.7(3) | N1-C2-C1   | 107.5(3) |
| N1-C2-Si2  | 119.5(2) | C1-C2-Si2  | 132.9(3) |
| Si1-C3-H3A | 109.5    | Si1-C3-H3B | 109.5    |
| H3A-C3-H3B | 109.5    | Si1-C3-H3C | 109.5    |
| H3A-C3-H3C | 109.5    | H3B-C3-H3C | 109.5    |

---

|            |            |            |            |
|------------|------------|------------|------------|
| Si1-C4-H4A | 109.5      | Si1-C4-H4B | 109.5      |
| H4A-C4-H4B | 109.5      | Si1-C4-H4C | 109.5      |
| H4A-C4-H4C | 109.5      | H4B-C4-H4C | 109.5      |
| Si1-C5-H5A | 109.5      | Si1-C5-H5B | 109.5      |
| H5A-C5-H5B | 109.5      | Si1-C5-H5C | 109.5      |
| H5A-C5-H5C | 109.5      | H5B-C5-H5C | 109.5      |
| Si2-C6-H6A | 109.5      | Si2-C6-H6B | 109.5      |
| H6A-C6-H6B | 109.5      | Si2-C6-H6C | 109.5      |
| H6A-C6-H6C | 109.5      | H6B-C6-H6C | 109.5      |
| Si2-C7-H7A | 109.5      | Si2-C7-H7B | 109.5      |
| H7A-C7-H7B | 109.5      | Si2-C7-H7C | 109.5      |
| H7A-C7-H7C | 109.5      | H7B-C7-H7C | 109.5      |
| Si2-C8-H8A | 109.5      | Si2-C8-H8B | 109.5      |
| H8A-C8-H8B | 109.5      | Si2-C8-H8C | 109.5      |
| H8A-C8-H8C | 109.5      | H8B-C8-H8C | 109.5      |
| N2-N1-C2   | 109.4(3)   | N1-N2-N3   | 106.9(3)   |
| N2-N3-C1   | 112.5(3)   | N2-N3-H1   | 118.(3)    |
| C1-N3-H1   | 128.(3)    | C3-Si1-C5  | 111.13(18) |
| C3-Si1-C4  | 108.15(17) | C5-Si1-C4  | 112.09(17) |
| C3-Si1-C1  | 107.82(16) | C5-Si1-C1  | 107.18(16) |
| C4-Si1-C1  | 110.39(16) | C7-Si2-C6  | 109.66(19) |
| C7-Si2-C8  | 108.01(18) | C6-Si2-C8  | 111.16(19) |
| C7-Si2-C2  | 108.62(16) | C6-Si2-C2  | 109.96(16) |
| C8-Si2-C2  | 109.37(17) |            |            |

---
